1 **Short- and long-term effects of amoxicillin/clavulanic acid or doxycycline on the**  
2 **gastrointestinal microbiome of growing cats**

3 Evangelia M. Stavroulaki<sup>1</sup>, Jan S. Suchodolski<sup>2</sup>, Rachel Pilla<sup>2</sup>, Geoffrey T. Fosgate<sup>3</sup>,  
4 Chi-Hsuan Sung<sup>2</sup>, Jonathan A. Lidbury<sup>2</sup>, Jörg M. Steiner<sup>2</sup>, Panagiotis G. Xenoulis<sup>1</sup>

5 <sup>1</sup>Clinic of Medicine, Faculty of Veterinary Science, University of Thessaly, Karditsa  
6 Greece

7 <sup>2</sup>Gastrointestinal Laboratory, Small Animal Clinical Sciences, College of Veterinary  
8 Medicine and Biomedical Sciences, Texas A&M University, College Station, Texas,  
9 United States of America

10 <sup>3</sup>Department of Production Animal Studies, University of Pretoria, Onderstepoort,  
11 South Africa

12 \*Corresponding author

13 E-mail: [evangelia.stavroulaki@gmail.com](mailto:evangelia.stavroulaki@gmail.com)

14

15

16

17

18

19

20

21

## 22 **Abstract**

23           Antibiotic treatment in early life influences gastrointestinal (GI) microbial  
24 composition and function. In humans, the resultant intestinal dysbiosis is associated  
25 with an increased risk for certain diseases later in life. The objective of this study was  
26 to determine the temporal effects of antibiotic treatment on the GI microbiome of  
27 young cats. Fecal samples were collected from cats randomly allocated to receive  
28 either amoxicillin/clavulanic acid (20 mg/kg q12h) for 20 days (AMC group; 15 cats)  
29 or doxycycline (10 mg/kg q24h) for 28 days (DOX group;15 cats) as part of the  
30 standard treatment of upper respiratory tract infection. In addition, feces were  
31 collected from healthy control cats (CON group;15 cats). All cats were approximately  
32 two months of age at enrolment. Samples were collected on days 0 (baseline), 20 or  
33 28 (AMC and DOX, respectively; last day of treatment), 60, 120, and 300. DNA was  
34 extracted and sequencing of the 16S rRNA gene and qPCR assays were performed.  
35 Fecal microbial composition was different on the last day of treatment for AMC cats,  
36 and 1 month after the end of antibiotic treatment for DOX cats, compared to CON  
37 cats. Species richness was significantly greater in DOX cats compared to CON cats on  
38 the last day of treatment. Abundance of Enterobacteriales was increased, and that of  
39 Erysipelotrichi was decreased in cats of the AMC group on the last day of treatment  
40 compared to CON cats. The abundance of the phylum Proteobacteria was increased in  
41 cats of the DOX group on days 60 and 120 compared to cats of the CON group. Only  
42 minor differences in abundances between the treatment groups and the control group  
43 were present on day 300. Both antibiotics appear to delay the developmental  
44 progression of the microbiome, and this effect is more profound during treatment with  
45 amoxicillin/clavulanic acid and one month after treatment with doxycycline. Future

46 studies are required to determine if these changes influence microbiome function and  
47 whether they have possible effects on disease susceptibility in cats.

48

## 49 **Introduction**

50 Antibiotic discovery represents one of the most important achievements in the  
51 history of medicine [1]. However, overuse of antibiotics compromises their health  
52 benefits because of the development and dissemination of antibiotic resistant genes.  
53 The development of multidrug resistant bacteria is associated with higher morbidity,  
54 mortality, and hospitalization costs [2]. Another reason to set boundaries on the  
55 extended use of antibiotics is their impact on the gastrointestinal (GI) microbiome [3].  
56 The extent that the microbiome is affected by antibiotics has become apparent after  
57 the application of “omics” approaches in research that allow the assessment of whole  
58 microbial communities and their functions [4].

59 The GI microbiome is a community of microorganisms and has been called “a  
60 hidden organ” [5]. This community of microorganisms is responsible for maintaining  
61 colonization resistance and produces substances with an impact on the host’s  
62 metabolism, immune system development and response, and appears to participate in  
63 the communication among different organs as well as in the manifestation and  
64 progression of diseases [6-14].

65 The term GI dysbiosis is used to describe the compositional and functional  
66 alterations of the GI microbiome in response to exogenous factors and/or the health  
67 status of the host [15]. Antibiotic-induced dysbiosis is characterized by a decrease in  
68 bacteria beneficial for the host (“health-associated bacteria”), allowing overgrowth of

69 potentially pathogenic bacteria, and a shift in microbially derived metabolic products  
70 [15, 16]. Antibiotic-induced microbial shifts can persist long term, and the  
71 abundances of some bacterial taxa might never return to their initial state. Other  
72 members of the microbiome, including the mycobiome and the virome are also  
73 affected by antibiotics, highlighting a global imbalance among members of  
74 microorganisms not directly inhibited by antibiotics [17]. Antibiotic-induced  
75 dysbiosis depends on the spectrum of antibacterial activity, type, duration, dosage,  
76 and route of administration in addition to individual host characteristics [18, 19].

77         The GI microbiome appears to be more susceptible to antibiotics when  
78 administered early in life. During that period, maturation of the immune system takes  
79 place concurrently with microbiome maturation. Antibiotics result in exposure of the  
80 host to a reduced number of microbes in the gut, as well as altered microbial signals  
81 by the host's immune system [20]. In addition, antibiotics administered early in life  
82 appear to delay the developmental progression of the microbiome into an adult-like  
83 state [21, 22]. Previous studies have shown that children exposed to antibiotics were  
84 more likely to develop inflammatory bowel disease [23, 24], obesity [25, 26], or  
85 asthma [27, 28] during childhood. Currently, limited data is available for cats. In one-  
86 study, all cats previously treated with amoxicillin/clavulanic acid and pradofloxacin  
87 developed diarrhea after experimental infection with enteropathogenic *E.coli* in  
88 contrast to non-treated cats, none of which developed clinical signs [29]. This study  
89 highlights that similarly to humans, antibiotic-induced dysbiosis likely reduces  
90 colonization resistance in cats.

91         Previous molecular studies investigating the effects of antibiotics on the feline  
92 GI microbiome have enrolled healthy laboratory born and bred domestic shorthair  
93 cats. In these studies, cats were adults, but belonged to various age groups and were

94 fed the same diet for the duration of each study [30-32]. In humans, antibiotics with  
95 an anaerobic spectrum of activity seem to have a more profound and prolonged effect  
96 on the gut microbiome, given that 95% of the GI bacteria are anaerobic [33].  
97 Administration of clindamycin affected the feline microbiome and metabolome long-  
98 term, with changes persisting for at least 2 years after withdrawal of the antibiotic  
99 [31]. Amoxicillin-clavulanic acid is effective mainly against gram positive  
100 microorganisms and microbial shifts were still detected 7 days after its withdrawal  
101 [30]. No studies to date have investigated the effect of doxycycline and antibiotic  
102 treatment in general on the gastrointestinal microbiome of young cats until they reach  
103 maturity.

104         The aim of this study was to describe and compare the fecal microbiome of  
105 cats receiving amoxicillin/clavulanic acid or doxycycline and control cats not  
106 receiving antibiotics and follow them up over a period of 10 months. A second goal  
107 was to describe the normal age-related changes of the feline microbiome changes  
108 during development.

109

## 110 **Materials and methods**

### 111 **Cats**

112         The protocol was reviewed and approved by the Animal Ethics Committee of  
113 the University of Thessaly, Greece (AUP number: 54/13.2.2018). A total of 72 eight-  
114 week-old rescue domestic shorthair (DSH) cats were enrolled in the study. Forty-four  
115 out of 72 cats were diagnosed with upper respiratory tract disease (URTD) before  
116 inclusion into the study. Diagnosis was based on a typical clinical presentation,

117 including conjunctivitis, blepharospasm, ocular and/or nasal discharge, nasal  
118 congestion, sneezing, and/or coughing. The cats were treated with antibiotics (see  
119 Treatment) as part of the standard treatment for this condition. In addition, 26  
120 clinically healthy cats or cats with very mild URTD that did not require antibiotic  
121 treatment were enrolled as controls.

122 Cats were either housed in foster homes or in individual cages at the Clinic of  
123 Medicine at the Faculty of Veterinary Science of the University of Thessaly. All cats  
124 were eventually adopted into private homes by the end of the study and owners signed  
125 an informed owner consent form. Upon initial enrollment, cats were kept under  
126 observation for a few days in case they developed clinical signs of GI disease. A  
127 physical examination was performed and antiparasitic treatment (Broadline,  
128 Boehringer Ingelheim) was administered to each cat before inclusion into the study.  
129 Data including sex, body weight, body condition score (BCS), presence of diarrhea  
130 and vomiting, temperature, and heart rate were recorded. Evaluation of BCS and fecal  
131 score (FS) was based on previously published scoring systems [34, 35]. Concurrent  
132 health conditions were recorded, and cats were excluded if these were severe enough  
133 to require hospitalization. All cats were on the same diet (GEMON Cat Breeder  
134 Kitten) for the duration of the study, to ensure that differences attributed to diet did  
135 not affect the results. No more than two related cats were included in the same group  
136 to ensure that relatedness did not impact the results. All cats were vaccinated  
137 according to recent vaccination guidelines [36].

## 138 **Treatments**

139 Cats with URTD were randomly allocated to receive either  
140 amoxicillin/clavulanate at 20 mg/kg q 12 h for 20 days (n=23, AMC group) or

141 doxycycline at 10 mg/kg q 24 h for 28 days (n=21, DOX group). These antibiotics  
142 were chosen because they constitute recognized first line treatments for URTD in cats  
143 [37]. In addition, 26 clinically healthy cats were enrolled as controls and did not  
144 receive any antibiotics during the study period (n=26, CON group).

## 145 **Sample collection and follow-up period**

146 Fecal samples were collected from each cat on days: 0 (all groups; one day  
147 after initial presentation and antiparasitic treatment), 20 (AMC group; last day of  
148 antibiotic treatment for AMC group), 28 (DOX and CON groups, last day of  
149 antibiotic treatment for DOX group), 60 (all groups), 120 (all groups), and 300 (all  
150 groups). Naturally voided fecal samples were collected from the litter box and placed  
151 into Eppendorf tubes. For cats that were adopted, owners were instructed to collect  
152 fecal samples from the litter box, freeze them over night and either bring them to the  
153 clinic or ship them packed with icepacks by overnight courier. Upon receipt, samples  
154 were immediately stored at -80°C pending analysis. On each sampling day, cats  
155 underwent a physical examination and the same data as for initial presentation were  
156 collected for all cats at all sampling times.

## 157 **DNA extraction**

158 Genomic DNA was extracted from 100 mg of each fecal sample using a  
159 MoBio PowerSoil® DNA isolation kit (Mo Bio Laboratories, USA) according to the  
160 manufacturer's instructions.

## 161 **16S rRNA sequencing**

162 Illumina sequencing of the bacterial 16S rRNA genes was performed using  
163 primers 515F (5'-GTGYCAGCMGCCGCGGTAA) [38] to 806RB (5'-

164 GGACTACNVGGGTWTCTAAT) [39] at the MR DNA laboratory (Shallowater,  
165 TX).

166 Sequences were processed and analyzed using a Quantitative Insights Into  
167 Microbial Ecology 2 (QIIME 2) [40] v 2018.6 pipeline. Briefly, the sequences were  
168 demultiplexed and the ASV table was created using DADA2 [41]. Prior to  
169 downstream analysis, sequences assigned as chloroplast, mitochondria, and low  
170 abundance ASVs, containing less than 0.01% of the total reads in the dataset were  
171 removed. All samples were rarefied to even sequencing depth, based on the lowest  
172 read depth of samples, to 8,275 sequences per sample. The raw sequences were  
173 uploaded to NCBI Sequence Read Archive under project number SRP16253.

174 Alpha diversity was measured with the Chao1 (richness), Shannon diversity  
175 (evenness) and observed ASVs (richness) metrics within QIIME2. Beta diversity was  
176 evaluated with the weighted and unweighted phylogeny-based UniFrac [42] distance  
177 metric and visualized using Principal Coordinate Analysis (PCoA) plots, generated  
178 within QIIME2.

## 179 **Quantitative PCR (qPCR)**

180 Quantitative PCRs were performed for selected bacterial groups that are  
181 commonly altered in canine and feline gastrointestinal disorders: total bacteria,  
182 *Faecalibacterium* spp., *Turicibacter* spp., *Streptococcus* spp., *Escherichia coli*,  
183 *Blautia* spp., *Fusobacterium* spp., *Clostridium hiranonis*, *Bifidobacterium* spp., and  
184 *Bacteroides* spp. The qPCR cycling, the oligonucleotide sequences of primers and  
185 probes, and respective annealing temperatures for selected bacterial groups have been  
186 described previously [43, 44].



## 187 **Statistical analysis**

188           Statistical analyses were performed using statistical software packages (SPSS  
189 version 23.0; and Prism version 9.0, GraphPad Software). For clinical data, a  
190 Kolmogorov-Smirnov test was used to assess the normality assumption. Clinical data  
191 did not pass normality testing, and therefore Kruskal-Wallis tests were used for  
192 among group comparisons while Friedman tests were used for within group  
193 comparisons. Pairwise comparisons were performed using Dunn's post hoc tests to  
194 determine which group categories were significantly different from each other as well  
195 as which time points were significantly different.

196           To determine differences in microbiome composition among and within the  
197 study groups, the analysis of similarities (ANOSIM) was performed using the  
198 statistical software package PRIMER 7 (PRIMER-E Ltd., Luton, UK) based on the  
199 unweighted and weighted UniFrac distance matrices. Differences in alpha diversity  
200 indices and differences in the abundances of bacterial taxa among and within groups  
201 were determined using a linear mixed model. Data were rank transformed prior to  
202 statistical analyses due to violation of the normality assumptions. Microbial  
203 compositions were initially screened for differences among groups with p values  
204 adjusted for multiple hypothesis testing using the Benjamini and Hochberg False  
205 discovery rate (FDR) and overall significance set at  $p < 0.05$ . For comparisons that  
206 were significant after FDR adjustment, a linear mixed model was fit including time,  
207 group, and the interaction between time and group as fixed effects and cat as a  
208 random effect. Multiple pairwise post hoc comparisons were adjusted using  
209 Bonferroni correction.

210

## 211 **Results**

### 212 **Clinical data**

213 Twenty-seven cats were excluded from the study because of owner non-  
214 compliance (7/72), death (9/72; 1 due to car accident, 1 due to fall from a balcony, 1  
215 due to feline infectious peritonitis, 1 due to heart failure, while 5 had unknown cause  
216 of death), they required a second course of antibiotics (5/72), use of antifungal  
217 treatment (3/72), or escape from home (3/72). Fifteen cats in each treatment group (45  
218 cats total) completed the study. These included 25 males and 20 females.  
219 Metagenomic analysis and clinical data assessment were only performed for the cats  
220 that completed the study.

221 On day 0, cats of the AMC group had significantly lower body weights (BW)  
222 (median 0.61 kg, range 0.37-0.95 kg) compared to CON cats (median 0.74 kg, range  
223 0.52-1.4 kg) ( $p=0.026$ ; Table 1). No other BW or BCS differences were identified  
224 among groups. On day 0, cats belonging to the DOX group had a significantly higher  
225 fecal score (FS) (median 4/7, range 2/7-7/7), i.e., had more commonly abnormal fecal  
226 consistency, compared to CON cats (median 2/7, range 1/7-6/7) ( $p=0.045$ ). On days  
227 20/28 and 60, AMC cats had a significantly higher FS (day 20, median 4/7, range 1/7-  
228 6/7; day 60, median 3/7, range 1/7-6/7) compared to CON cats (days 28 and 60,  
229 median 2/7, range 1/7-3/7) ( $p<0.05$ ). Clinical data and p values from the remaining  
230 timepoints are listed in Table 1.

231 **Table 1: Clinical characteristics of cats included in the study.**

|              | Body weight (kg) |           |        |           |        |           | P value      |
|--------------|------------------|-----------|--------|-----------|--------|-----------|--------------|
|              | AMC              |           | DOX    |           | CON    |           |              |
|              | Median           | Range     | Median | Range     | Median | Range     |              |
| <b>Day 0</b> | 0.61             | 0.37-0.95 | 0.68   | 0.39-1.20 | 0.74   | 0.52-1.40 | <b>0.026</b> |

|                  |                                      |              |               |              |               |              |                  |
|------------------|--------------------------------------|--------------|---------------|--------------|---------------|--------------|------------------|
| <b>Day 20/28</b> | 1.00                                 | 0.80-1.56    | 1.18          | 0.87-1.73    | 1.26          | 0.77-1.60    | 0.217            |
| <b>Day 60</b>    | 1.70                                 | 1.36-1.80    | 1.70          | 1.25-2.00    | 1.92          | 1.15-2.50    | 0.120            |
| <b>Day 120</b>   | 2.50                                 | 1.98-3.79    | 2.62          | 1.99-3.05    | 2.80          | 1.69-3.80    | 0.746            |
| <b>Day 300</b>   | 4.10                                 | 2.70-5.75    | 4.19          | 3.33-5.80    | 4.00          | 2.30-6.00    | 0.797            |
|                  | <b>Body condition score (1 to 9)</b> |              |               |              |               |              |                  |
|                  | <b>AMC</b>                           |              | <b>DOX</b>    |              | <b>CON</b>    |              | <b>P value</b>   |
|                  | <b>Median</b>                        | <b>Range</b> | <b>Median</b> | <b>Range</b> | <b>Median</b> | <b>Range</b> |                  |
| <b>Day 0</b>     | 4                                    | 2-6          | 4             | 3-5          | 4             | 3-5          | 0.107            |
| <b>Day 20/28</b> | 4                                    | 4-5          | 4             | 4-5          | 4             | 4-5          | 0.717            |
| <b>Day 60</b>    | 4                                    | 4-6          | 4             | 4-5          | 4             | 3-5          | 0.651            |
| <b>Day 120</b>   | 4                                    | 4-6          | 4             | 4-6          | 4             | 4-6          | 0.935            |
| <b>Day 300</b>   | 4                                    | 3-7          | 5             | 4-6          | 5             | 3-6          | 0.281            |
|                  | <b>Fecal score (1 to 7)</b>          |              |               |              |               |              |                  |
|                  | <b>AMC</b>                           |              | <b>DOX</b>    |              | <b>CON</b>    |              | <b>P value</b>   |
|                  | <b>Median</b>                        | <b>Range</b> | <b>Median</b> | <b>Range</b> | <b>Median</b> | <b>Range</b> |                  |
| <b>Day 0</b>     | 3                                    | 2-6          | 4             | 2-7          | 2             | 1-6          | <b>0.045</b>     |
| <b>Day 20/28</b> | 4                                    | 1-6          | 3             | 2-5          | 2             | 1-3          | <b>&lt;0.001</b> |
| <b>Day 60</b>    | 3                                    | 1-6          | 3             | 1-5          | 2             | 1-3          | <b>0.035</b>     |
| <b>Day 120</b>   | 2                                    | 1-5          | 2             | 1-5          | 2             | 1-4          | 0.221            |
| <b>Day 300</b>   | 2                                    | 1-5          | 2             | 1-3          | 2             | 1-3          | 0.195            |

232 AMC, cats treated with amoxicillin/clavulanic acid for 20 days; DOX, cats treated

233 with doxycycline for 28 days; CON, healthy cats that did not receive antibiotics.

234 Bolded p-values indicate a statistically significant difference between groups.

## 235 **1. Effect of aging on the microbiome of untreated cats**

### 236 **1.A) Sequence analysis - alpha and beta diversity**

237 High interindividual variations in bacterial abundances were observed in all

238 groups on day 0 and within the CON group significant changes occurred over time.

239 These changes were attributed to the process of microbial maturation, therefore results

240 from this group are discussed separately. In total, the sequence analysis of the 225

241 fecal samples yielded 1,861,875 quality sequences. There were no differences in any

242 of the species richness and evenness indices over time in control cats (Table 2).

243 However, the phylogenetic community structure clustered significantly different over

244 time ( $p < 0.05$ ) and was increasingly more distinct as cats were getting older based on

245 the increasing ANOSIM effect size of unweighted and weighted UniFrac distances  
246 (Fig 1).

247 **Table 2: Alpha diversity metrics (mean  $\pm$  standard deviation) of control cats.**

248 There were no significant changes in indices of diversity over time

| Metric               | Day 0               | Day 28              | Day 60              | Day 120             | Day 300             | <i>P</i> value |
|----------------------|---------------------|---------------------|---------------------|---------------------|---------------------|----------------|
| <b>Observed ASVs</b> | 100.2<br>$\pm$ 33.2 | 99.9<br>$\pm$ 21.2  | 108.2<br>$\pm$ 22.9 | 108.5<br>$\pm$ 19.5 | 112.5<br>$\pm$ 19.8 | 0.462          |
| <b>Chao1</b>         | 100.4<br>$\pm$ 33.2 | 100.8<br>$\pm$ 21.8 | 109.2<br>$\pm$ 23   | 109.1<br>$\pm$ 19.7 | 113.2<br>$\pm$ 20.4 | 0.510          |
| <b>Shannon index</b> | 6.1 $\pm$ 0.4       | 6.2 $\pm$ 0.3       | 6.3 $\pm$ 0.3       | 6.2 $\pm$ 0.3       | 6.3 $\pm$ 0.3       | 0.593          |

249

250 **Fig 1. Principal Coordinate Analysis of unweighted UniFrac distances of 16S**  
251 **rRNA genes representing the differences in microbial community composition**  
252 **within the control group on day 0 (red circles), day 28 (blue circles), 60 (yellow**  
253 **circles), 120 (green circles), and 300 (purple circles).**

254

255 **1.B) Sequence analysis – abundance of individual bacterial taxa**

256 At 2 months of age (day 0) the most prevalent phylum (regardless of the  
257 group) was Firmicutes (63.5%), followed by Actinobacteria (13.9%), Bacteroidetes  
258 (11.6%), Proteobacteria (6.0%), and Fusobacteria (4.9%). The abundance of  
259 Proteobacteria was significantly reduced to less than 1% ( $p = 0.009$ ) by 4 months of  
260 age in the control cats (Fig 2). Table S1 contains summary statistics for all taxonomic  
261 classifications (i.e., phylum, class, order, family, genus, and species).

262 Clostridia, Clostridiales, and Lachnospiraceae, were the most prevalent class,  
263 order, and family, respectively, present in fecal samples from control cats during their

264 first year of age. In addition, *Blautia* spp., *Collinsella* spp., *Lactobacillus* spp.,  
265 *Bifidobacterium* spp., *Bacteroides* spp., and unclassified Lachnospiraceae constituted  
266 the predominant genera.

267 The majority of differences in the abundances of bacteria within the control  
268 cats occurred between 2 and 6 months of age. The abundance of  
269 Gammaproteobacteria significantly decreased from 5.5% at 2 months to 3.2% at 3  
270 months of age ( $p = 0.007$ ) and that of Enterobacteriales from 3.7% to less than 0.5%  
271 ( $p = 0.009$ ) during the same period. The abundance of Erysipelotrichi increased from  
272 1.9% at 2 months to 5% at 3 months of age ( $p = 0.030$ ) (Fig 2). The abundance of  
273 Bacilli reduced from 16.4% at 3 months to 3.7% at 4 months of age ( $p = 0.018$ ). The  
274 only changes observed after 6 months of age included an increase in the abundance of  
275 Aeromonadales ( $p = 0.002$ ) (Fig 2).

276

277 **Fig 2. Bacterial groups that significantly changed over time within the control**  
278 **group based on sequence analysis. Means and standard deviations are displayed.**

279

### 280 **1.C) Quantitative polymerase chain reaction (qPCR) for selected** 281 **bacterial groups**

282 In the CON group, *E.coli* decreased ( $p < 0.001$ ), and *Faecalibacterium* spp.  
283 increased ( $p = 0.032$ ) from 2 to 3 months of age (Fig 3). Table S2 contains a summary  
284 of all bacterial taxa analyzed by qPCR.

285

286 **Fig 3. Bacterial groups that significantly changed over time within the control**  
287 **group based on qPCR analysis. Means and standard deviations are displayed.**

288

## 289 **2. Effect of antibiotics on the GI microbiome**

290 The effect of antibiotics on the GI microbiota was assessed based on  
291 comparisons among groups on the same timepoints. Because the GI microbiome  
292 normally changes over time as it evolves towards maturity, overtime comparisons  
293 within the same group were considered to not accurately reflect the effects of  
294 antibiotics.

295 A high interindividual variation of bacterial abundances was observed in all  
296 groups on day 0. The alpha diversity indices (Table S3), the ANOSIM of unweighted  
297 and weighted UniFrac distances (Table S4, Fig S1), and bacterial abundances (Table  
298 S1) did not differ significantly among groups on day 0.

### 299 **2.1. Amoxicillin/clavulanic acid group**

#### 300 **2.1.A) Sequence analysis - alpha and beta diversity**

301 The AMC group showed reduced evenness on the last day of treatment (day 20)  
302 compared to DOX and CON groups; this decrease approached but did not reach  
303 statistical significance (Shannon index,  $p = 0.061$ ) (Table S3, Fig 4). A statistically  
304 significant difference in microbial community composition on the last day of  
305 treatment (day 20) was observed for AMC cats, compared to both DOX (ANOSIM  $R = 0.109$ ,  $p = 0.011$ ) and CON (ANOSIM  $R = 0.188$ ,  $p = 0.001$ ) cats based on  
306 unweighted analysis (Table S4, Fig 5). On days 60 and 300, there was a less distinct  
307 clustering of the microbiome in AMC cats compared to CON cats (based on  
308 decreasing ANOSIM effect size) as demonstrated by unweighted (ANOSIM day 60  $R = 0.056$ ,  $p = 0.075$ , ANOSIM day 300  $R = 0.077$ ,  $p = 0.058$ ) and weighted distances  
309  
310

311 (ANOSIM day 300  $R = 0.057$ ,  $p = 0.074$ ), but this difference did not reach statistical  
312 significance (Fig S1).

313 **Fig 4. Alpha diversity differences between cats treated with**  
314 **amoxicillin/clavulanic acid (black), cats treated with doxycycline (blue), and**  
315 **healthy control cats (red). Means and standard deviations within each group are**  
316 **displayed.**

317 **Fig 5. Principal Coordinate analysis (PCoA) plot of unweighted Unifrac distance**  
318 **in cats treated with amoxicillin clavulanic acid (red = AMC), cats treated with**  
319 **doxycycline (yellow = DOX), and control cats (blue = CON) on day 20/28.**

320

## 321 **2.1.B) Sequence analysis - abundance of individual bacterial taxa**

322 Amoxicillin/clavulanic acid had a significant impact on the GI microbiome. In  
323 fact, the normal age-related changes of the microbiome observed in CON cats were  
324 not observed in this group. Erysipelotrichi ( $p = 0.008$ ), *Catenibacterium* spp. ( $p =$   
325  $0.045$ ), and unclassified Lachnospiraceae ( $p = 0.002$ ) were detected in significantly  
326 lower abundances, whereas Enterobacteriales ( $p=0.010$ ) was found in significantly  
327 higher abundances in feces from AMC cats compared to CON cats on the last day of  
328 treatment (day 20/28) (Figs 6 and 7). Three (day 120) and 9 months (day 300) after  
329 amoxicillin/clavulanic acid discontinuation, AMC cats harbored significantly higher  
330 abundances of unclassified *Collinsella* spp. compared to CON cats (Fig 7).

331 Most of the differences in bacterial abundances between AMC and CON  
332 groups were found during treatment, (from 2 to 3 months of age), while after that  
333 period only minor changes were observed. In AMC cats, Gammaproteobacteria

334 abundances remained the same during treatment (i.e., from 2 to 3 months)  
335 representing approximately 9% of total sequences, while in CON cats they decreased  
336 during the same period, representing 3% of total sequences ( $p = 0.009$ ). At 1 month  
337 after antibiotic withdrawal (4 months of age), Gammaproteobacteria decreased to  
338 <1% in AMC cats ( $p = 0.030$ ), reaching similar levels to those in CON cats at this age  
339 (Fig 7). Erysipelotrichi abundances represented 2.5% of the total sequences in AMC  
340 cats before treatment, and decreased to less than 2% after treatment, while in CON  
341 cats, Erysipelotrichi abundances increased at this age. On day 60, both groups  
342 harbored similar abundances of this bacterium (Fig 6).

343

344 **Fig 6. Bacterial groups that showed a significantly decreased abundance after**  
345 **antibiotic treatment (AMC and DOX group) compared to the control group**  
346 **(CON group). Means and standard deviations within each group are displayed.**

347 **Fig 7. Bacterial groups that showed a significantly increased abundance after**  
348 **antibiotic treatment (AMC and DOX groups) compared to the control group**  
349 **(CON group). Means and standard deviations within each group are displayed.**

350

### 351 **2.1.C) qPCR for selected bacterial groups**

352 On the last day of treatment, lower total bacterial counts ( $p = 0.003$ ) and higher  
353 abundances of *E. coli* ( $p = 0.002$ ) were detected in the feces of AMC cats compared to  
354 CON cats (Fig 8).

355 Bacterial abundances in the AMC group demonstrated a different pattern  
356 compared to the CON group. In the AMC group, *E. coli* abundances did not change



357 between 2 to 3 months of age (i.e., during treatment), and then significantly decreased  
358 at 4 months of age ( $p = 0.012$ ) (Fig 8).

359 **Fig 8. Fecal abundances of selected bacterial taxa among cats treated with**  
360 **amoxicillin/clavulanic acid (AMC), cats treated with doxycycline (DOX), and**  
361 **healthy cats (CON) analyzed with qPCR. Means and standard deviations within**  
362 **each group are displayed.**

363

## 364 **2.2. Doxycycline group**

### 365 **2.2.A) Sequence analysis – alpha and beta diversity**

366 DOX cats had a significantly higher species richness (observed ASVs,  $p =$   
367  $0.025$ ; Chao1,  $p = 0.029$ ) (Table S3, Fig 4) on the last day of treatment and a different  
368 clustering of the microbiome 1 month after treatment (day 60) compared to CON cats  
369 (ANOSIM  $R = 0.100$ ,  $p = 0.021$ ) (Table S4, Fig 9).

370

371 **Fig 9. Principal Coordinate analysis (PCoA) plot of weighted Unifrac distances**  
372 **in cats treated with amoxicillin/clavulanic acid (red = AMC), cats treated with**  
373 **doxycycline (yellow = DOX), and control cats (blue = CON) on day 60.**

374

### 375 **2.2.B) Sequence analysis – abundance of individual bacterial taxa**

376 Doxycycline caused pronounced changes in the abundances of bacterial  
377 communities, but its effects appeared 1 month after its discontinuation.

378 *Catenibacterim* spp., and unclassified *Lachnospiraceae* spp. (both  $p = 0.039$ ) were  
379 detected at significantly lower abundances whereas Proteobacteria ( $p = 0.001$ ) and

380 Enterobacteriales ( $p = 0.018$ ) at significantly higher abundances in the feces of DOX  
381 cats compared to CON cats on day 60 (Figs 6,7). The increase in the abundance of  
382 Proteobacteria persisted for 3 months after antibiotic withdrawal ( $p = 0.026$ ). In  
383 addition, at 3 and 9 months after antibiotic withdrawal, the abundance of unclassified  
384 *Collinsella* spp. was significantly higher in cats of the DOX group compared to cats  
385 of the CON group ( $p = 0.025$ ) (Fig 7). Unclassified *Bulleidia* spp. were detected at  
386 higher abundances ( $p = 0.023$ ) in DOX cats 9 months after its discontinuation (Fig 6).  
387 Fig 10 shows a percentage plot of bacterial abundances at a class level among groups.

388 **Fig 10. Relative abundance of bacterial taxa at a class level among groups.**

389

### 390 **2.2.C) qPCR for selected bacterial groups**

391 On day 60, higher *E. coli* abundances ( $p = 0.035$ ) were found in DOX cats  
392 compared to CON cats (Fig 8).

393

## 394 **Discussion**

395 Our goals were to describe the effects of treatment with amoxicillin/clavulanic  
396 acid or doxycycline on the GI microbiome of young cats and the microbial recovery  
397 after antibiotic exposure early in life. Our study showed substantial changes in the GI  
398 microbiome from 2 months until one year of age in cats, with antibiotics having a  
399 differential impact on the developing GI microbiome. Amoxicillin/clavulanic acid  
400 caused pronounced effects during treatment while the effects of doxycycline appeared  
401 1 month after its withdrawal. Both antibiotics mainly affected members of Firmicutes  
402 and Proteobacteria and resulted in a delay in the developmental progression of the

403 microbiome compared to the pattern of microbial changes observed over time in cats  
404 not treated with antibiotics.

405       Importantly, a high interindividual variation in bacterial abundances was  
406 observed in cats at 2 months of age (before exposure to antibiotics). In humans and  
407 dogs, during the phase of microbiota maturation, high-interindividual differences in  
408 bacterial abundances occur [45-47], therefore the large variation observed in our study  
409 likely represents an immature microbiome in cats at 2 months of age. In addition, the  
410 largest shifts in the GI microbiota in the control cats occurred during the age of 2 to 6-  
411 months suggesting that the normal GI microbiome evolves in kittens and reaches  
412 maturity around the age of 6 months. Although conflicting evidence exists about  
413 whether the microbiome reaches an adult-like state at the end of the weaning period in  
414 dogs and cats [8, 48, 49], in a previous canine study, 2-month-old puppies still  
415 harbored a significantly different microbiome compared to adult dogs [45].

416       In adult humans, the abundances of approximately 70% of the GI bacterial  
417 members is relatively stable for at least 12 months [8]. Therefore, in contrast to adult  
418 cats, the duration of antibiotic effects on the developing GI microbiome could only be  
419 investigated by evaluating a control group to adjust for age-related changes. The fact  
420 that there was a large variation in microbial community composition at baseline  
421 among cats likely led to unique responses to antibiotics. The microbiome is  
422 considered as unique as an individual's fingerprint [50], and during the maturation  
423 period, unpredictable shifts could occur that have not been adequately described in  
424 cats. Despite the high variability, the core bacterial taxa in cats of our study were  
425 Firmicutes and Actinobacteria from 2 months until 1 year of age. This is in agreement  
426 with previous studies investigating the effects of dietary nutrient composition [48, 51,  
427 52], sex, and sexual status [49] on the fecal microbiome of young cats.

428 Current knowledge suggests that the first microbes colonizing the GI tract are  
429 mainly facultative anaerobic bacteria that reduce oxygen concentrations in the gut and  
430 allow for successful colonization of the obligative anaerobic bacteria [53]. The  
431 phylum Proteobacteria, which is comprised by facultative and obligative anaerobic  
432 bacteria, is among the first colonizers of the GI tract in humans [53, 54]. At the  
433 weaning period and after the introduction of a solid diet (i.e., around 5-6 months of  
434 age), the abundance of Proteobacteria gradually decreases [55]. Our finding of an age-  
435 dependent decrease in bacterial taxa belonging to Proteobacteria (i.e.,  
436 Enterobacteriales, *Escherichia coli*) observed between 2 to 4 months of age in control  
437 cats in this study is in agreement with these data in humans. In addition, a concurrent  
438 increase in the abundance of taxa belonging to Firmicutes (i.e., Erysipelotrichales)  
439 occurred in the same group during the same period, which has also been reported by  
440 another study in cats of a similar age and reflects the introduction of dietary  
441 macronutrients that are utilized by these bacteria [51].

442 Amoxicillin is a semisynthetic penicillin that is active against some non-beta-  
443 lactamase producing gram-positive bacteria and few gram-negative bacteria. The  
444 addition of a beta lactamase inhibitor, such as clavulanic acid, increases the spectrum  
445 of activity of amoxicillin [56]. Doxycycline belongs to tetracyclines, a class of  
446 bacteriostatic antibiotics with broad spectrum activity against bacteria, rickettsiae, and  
447 protozoal organisms. Tetracyclines are also known for their anti-inflammatory  
448 properties, which seem to contribute to their therapeutic efficacy [57]. These  
449 antibiotics constitute two of the most commonly prescribed antibiotics in young cats.

450 Treatment with amoxicillin/clavulanic acid led to a trend in reduced species  
451 richness and evenness, although this varied among cats and it did not reach statistical  
452 significance. Similarly, in one study in adult laboratory cats, amoxicillin/clavulanic

453 acid for 7 days reduced the number of different species observed and this effect  
454 persisted for 7 days after discontinuation of the antibiotic [30]. In our study, species  
455 richness indices were indistinguishable from untreated cats by 1 month after  
456 discontinuation of amoxicillin/clavulanic acid.

457 Doxycycline had a different effect on the GI microbiome. Increased  
458 abundance of different species were observed by the end of treatment. Antibiotics,  
459 including doxycycline and amoxicillin most commonly either decrease [58-62], or do  
460 not have any effect on species richness [63]. Only few studies have reported an  
461 increase in species richness indices [64, 65]. In our study, doxycycline had no effect  
462 on bacterial abundances and community composition on the last day of the treatment  
463 period (day 28). Alternatively, the lack of an effect of doxycycline on bacterial genera  
464 that would be expected to decrease as shown in control cats, could be responsible for  
465 the observed increased species richness in doxycycline-treated cats. The bloom of  
466 these genera might be attributed either to resistance to tetracyclines or to the  
467 concurrent decrease of some bacteria that produce antimicrobial peptides thus  
468 allowing members of these genera to remain at increased levels [66].

469 Microbial community composition was distinct in cats treated with  
470 amoxicillin/clavulanic acid and indistinguishable in cats treated with doxycycline  
471 compared to control cats on the last day of treatment. Interestingly, the effect of  
472 doxycycline was not evident until 1 month after its discontinuation of the drug.  
473 Similar results have been described in a single study in mice, where the most  
474 profound changes in microbial community composition started 1 month after  
475 doxycycline discontinuation [67]. In addition, in our study, a trend for significant  
476 differences in microbial community composition were observed in  
477 amoxicillin/clavulanic acid-treated cats 3 and 9 months after antibiotic withdrawal.

478 Contradictory findings exist in the literature with humans, laboratory animals and in  
479 vitro studies reporting high interindividual effects [68], no effects [69, 70], only short-  
480 term effects [62, 65], or both short- and long-term effects on microbial composition  
481 [60, 71, 72] after administration of amoxicillin with or without clavulanic acid. In a  
482 study in rats, a 7-day course of amoxicillin during the weaning period caused transient  
483 alterations in microbial composition that resolved by 20 days after its discontinuation  
484 [61]. In another study in infants, a 5- to 8-day course of amoxicillin caused long-term  
485 changes in microbial composition that persisted for 6 months after treatment  
486 withdrawal [72].

487         While the total abundance of the phylum Firmicutes was not significantly  
488 altered, certain bacterial members of this phylum showed significant shifts in response  
489 to antibiotics. Amoxicillin/clavulanic acid and doxycycline administration caused a  
490 transient decrease of the abundance of the order Erysipelotrichales and its sub-groups  
491 Erysipelotrichaceae and *Catenibacterium* spp. The family Erysipelotrichaceae  
492 contains bile salt hydrolase (BSH) genes, and this enzyme is responsible for the  
493 deconjugation of primary bile acids [73, 74]. Thus, the decrease observed could  
494 potentially lead to increased concentrations of deconjugated primary bile acids in the  
495 gut. In addition to potential bile acid dysmetabolism in cats treated with antibiotics,  
496 one of the main converters of primary bile acids into secondary bile acids in dogs and  
497 cats is *Clostridium hiranonis*, which showed a decreased abundance in response to  
498 both antibiotics in our study, although this change did not reach statistical significance  
499 for either treatment [75]. Families belonging to Clostridiales were affected by  
500 antibiotics with a significant decrease in unclassified Lachnospiraceae. The family  
501 Lachnospiraceae was the predominant family present at all time points in all groups.  
502 Members of this family ferment carbohydrates leading to the production of butyrate

503 [76]. Butyrate is one of the main short chain fatty acids (SCFAs) in the gut and has  
504 anti-inflammatory properties, is a major energy source for colonocytes, and its  
505 absence causes autophagy of epithelial intestinal cells in germ-free mice [77, 78]. As  
506 a result, SCFAs might be another main metabolic class influenced by antibiotic  
507 treatment. A more comprehensive picture of the antibiotic effects on the GI  
508 microbiome could therefore be obtained by applying other “omics” approaches  
509 including metabolomic analysis leading to a better understanding of the metabolic  
510 pathways affected by antibiotics.

511         Among Actinobacteria, the abundance of unclassified *Collinsella* spp. was  
512 higher in both antibiotic-treated groups than in controls at 3 months after  
513 discontinuation of treatment. This effect persisted in the amoxicillin-clavulanic acid  
514 group for 9 months. Early colonization with *Collinsella* spp. within the first 6 months  
515 of life is associated with increased adiposity in humans, [55] and also increased  
516 *Collinsella* spp. abundances have been reported in cats with diarrhea [79, 80].

517         Based both on sequencing and qPCR analysis, bacterial taxa belonging to  
518 Proteobacteria (Gammaproteobacteria, order Enterobacteriales, family  
519 Enterobacteriaceae, *Escherichia coli*) were found at significantly higher abundances  
520 on the last day of treatment (20 days) for amoxicillin/clavulanic acid and at 3 months  
521 after discontinuation of doxycycline before decreasing to similar abundances to that  
522 of control cats. The family Enterobacteriaceae is the most common microbial member  
523 that increases in abundance after antibiotic treatment in humans regardless of the  
524 antibiotic class [81]. In dogs, metronidazole [82] and amoxicillin [83], but not tylosin  
525 [84, 85], are reported to increase the abundance of Enterobacteriaceae. In cats, this  
526 effect has been observed for amoxicillin [30] and clindamycin [31, 32] with the latter  
527 leading to a 2-months persistent increase in Enterobacteriaceae [32]. The phylum

528 Proteobacteria encompasses some of the most well-known pathogens [54] and  
529 members of this phylum are commonly increased in dogs [86-91] and cats with GI  
530 disease [79, 80, 92-94], as well as during consumption of high-protein, canned and  
531 raw diets [48, 51, 52, 95]. Both antibiotic treated groups had higher fecal scores  
532 during treatment compared to healthy cats, therefore episodes of diarrhea may be  
533 associated with increased abundances of Proteobacteria members.

534 Previous studies in humans have shown that antibiotics delay the  
535 developmental progression of the microbiome into an adult-like state [21, 22]. In  
536 agreement with these findings and compared to untreated cats of our study, a delay in  
537 maturation was observed in both antibiotic-treated groups. This delay was  
538 characterized by reduced abundances of taxa belonging to Firmicutes and increased  
539 abundances of taxa belonging to Proteobacteria. The most profound delay occurred  
540 between 2 to 3 months of age in the amoxicillin/clavulanic acid-treated cats and  
541 between 3 to 6 months of age in the doxycycline-treated cats.

542 Our study had some limitations. All cats were stray at study initiation; thus,  
543 their exact date of birth was unknown and slight differences in the enrollment age  
544 might have influenced the microbiota composition. Some cats were malnourished, and  
545 malnourishment has been associated with a persistently immature microbiome in  
546 children [96]. In addition, some cats were found at a very young age and required  
547 formula feeding, which in children is also reported to impact microbiome colonization  
548 compared to breastfeeding [97]. The maternal diet of cats also has an impact on the  
549 microbiome of the offspring until its 17th week of age [98] and in our study the  
550 maternal dietary status was unknown. Although the above factors have been  
551 investigated in humans, no studies regarding their impact on the feline microbiota



552 exist. Finally, cats treated with doxycycline had a significantly higher fecal scores at  
553 baseline, which might also have influenced the abundance of some bacterial taxa.

## 554 **Conclusion**

555 Overall, our results indicate that the GI microbiome of cats changes after 2  
556 months of age and reaches an adult-like state around 6 months of age.  
557 Amoxicillin/clavulanic acid and doxycycline treatment early in life significantly  
558 affected the developing microbiome richness and composition in cats. The abundance  
559 of members of Firmicutes decreased and that of members of Proteobacteria increased  
560 after 20 days of amoxicillin/clavulanic acid treatment and 1 month after a 28-day  
561 course of doxycycline. Only minor changes were observed 9 months after  
562 amoxicillin/clavulanic acid or doxycycline discontinuation with an increase in the  
563 abundance of unclassified *Collinsella* spp. and unclassified *Bulleidia* spp.,  
564 respectively. Our results suggest that doxycycline had a delayed impact whereas  
565 amoxicillin/clavulanic acid had a more immediate impact on bacterial community  
566 composition and only minor changes persisted 9 months after discontinuation of  
567 either antibiotic. Future studies utilizing additional approaches to gain a better  
568 understanding of the microbial functional changes caused by antibiotics would be  
569 useful.

## 570 **Acknowledgments**

571 Preliminary results were presented at the: a) 29<sup>th</sup> European College of Veterinary  
572 Internal Medicine Congress, Milan, Italy, September 19<sup>th</sup> to 21<sup>st</sup> 2019; b) the 38<sup>th</sup>  
573 Forum of the American College of Veterinary Internal Medicine (ACVIM), June 10<sup>th</sup>

574 to13<sup>th</sup> 2020; and c) the 39<sup>th</sup> Forum of the American College of Veterinary Internal

575 Medicine (ACVIM), June 9<sup>th</sup> to12<sup>th</sup> 2021.

576 The authors would like to thank Gerolymatos International S.A. for providing

577 products for antiparasitic treatment (Broadline) and vaccines (Purevax RCPH, Purevax

578 Rabies) for the cats in this study.

579

## 580 **References**

581 1. Mohr KI. History of antibiotics research. *Curr Top Microbiol Immunol*.  
582 2016;398:237-72. doi: 10.1007/82\_2016\_499.

583 2. Agyepong N, Govinden U, Owusu-Ofori A, Essack SY. Multidrug-resistant  
584 gram-negative bacterial infections in a teaching hospital in Ghana. *Antimicrob Resist*  
585 *Infect Control*. 2018;7:37. doi: 10.1186/s13756-018-0324-2.

586 3. Modi SR, Collins JJ, Relman DA. Antibiotics and the gut microbiota. *J Clin*  
587 *Invest*. 2014;124(10):4212-8. doi: 10.1172/JCI72333.

588 4. Alessandri G, Milani C, Mancabelli L, Longhi G, Anzalone R, Lugli GA, et al.  
589 Deciphering the bifidobacterial populations within the canine and feline gut microbiota.  
590 *Appl Environ Microbiol*. 2020;86(7):e02875-19. doi: 10.1128/AEM.02875-19.

591 5. O'Hara AM, Shanahan F. The gut flora as a forgotten organ. *EMBO Rep*.  
592 2006;7(7):688-93. doi: 10.1038/sj.embor.7400731

593 6. Belkaid Y, Hand TW. Role of the microbiota in immunity and inflammation.  
594 *Cell*. 2014;157(1):121-41. doi: 10.1016/j.cell.2014.03.011.

595 7. Lyu Y, Su C, Verbrugghe A, Van de Wiele T, Martos Martinez-Caja A, Hesta  
596 M. Past, present, and future of gastrointestinal microbiota research in cats. *Front*  
597 *Microbiol*. 2020;11:1661. doi: 10.3389/fmicb.2020.01661.

598 8. Pilla R, Suchodolski JS. The role of the canine gut microbiome and metabolome  
599 in health and gastrointestinal disease. *Front Vet Sci*. 2019;6:498. doi:  
600 10.3389/fvets.2019.00498.

601 9. Tizard IR, Jones SW. The microbiota regulates immunity and immunologic  
602 diseases in dogs and cats. *Vet Clin North Am Small Anim Pract*. 2018;48(2):307-22.  
603 doi: 10.1016/j.cvsm.2017.10.008.

604 10. Kaur H, Bose C, Mande SS. Tryptophan metabolism by gut microbiome and  
605 gut-brain-axis: an in silico analysis. *Front Neurosci*. 2019;13:1365. doi:  
606 10.3389/fnins.2019.01365.

607 11. Stinson LF. Establishment of the early-life microbiome: a DOHaD perspective.  
608 *J Dev Orig Health Dis*. 2020;11(3):201-10. doi: 10.1017/S2040174419000588.

609 12. Candon S, Perez-Arroyo A, Marquet C, Valette F, Foray AP, Pelletier B, et al.  
610 Antibiotics in early life alter the gut microbiome and increase disease incidence in a  
611 spontaneous mouse model of autoimmune insulin-dependent diabetes. *PLoS One*.  
612 2015;10(5):e0125448. doi: 10.1371/journal.pone.0125448.

613 13. Turnbaugh PJ, Ley RE, Mahowald MA, Magrini V, Mardis ER, Gordon JI. An  
614 obesity-associated gut microbiome with increased capacity for energy harvest. *Nature*.  
615 2006;444(7122):1027-31. doi: 10.1038/nature05414.

- 616 14. Soontararak S, Chow L, Johnson V, Coy J, Webb C, Wennogle S, et al. Humoral  
617 immune responses against gut bacteria in dogs with inflammatory bowel disease. *PLoS*  
618 *One*. 2019;14(8):e0220522. doi: 10.1371/journal.pone.0220522.
- 619 15. Levy M, Kolodziejczyk AA, Thaïss CA, Elinav E. Dysbiosis and the immune  
620 system. *Nat Rev Immunol*. 2017;17(4):219-32. doi: 10.1038/nri.2017.7.
- 621 16. Vangay P, Ward T, Gerber JS, Knights D. Antibiotics, pediatric dysbiosis, and  
622 disease. *Cell Host Microbe*. 2015;17(5):553-64. doi: 10.1016/j.chom.2015.04.006.
- 623 17. Ferrer M, Mendez-Garcia C, Rojo D, Barbas C, Moya A. Antibiotic use and  
624 microbiome function. *Biochem Pharmacol*. 2017;134:114-26. doi:  
625 10.1016/j.bcp.2016.09.007.
- 626 18. Neuman H, Forsythe P, Uzan A, Avni O, Koren O. Antibiotics in early life:  
627 dysbiosis and the damage done. *FEMS Microbiol Rev*. 2018;42(4):489-99. doi:  
628 10.1093/femsre/fuy018.
- 629 19. Koo H, Hakim JA, Crossman DK, Kumar R, Lefkowitz EJ, Morrow CD.  
630 Individualized recovery of gut microbial strains post antibiotics. *NPJ Biofilms*  
631 *Microbiomes*. 2019;5:30. doi: 10.1038/s41522-019-0103-8.
- 632 20. Hornef MW, Torow N. 'Layered immunity' and the 'neonatal window of  
633 opportunity' - timed succession of non-redundant phases to establish mucosal host-  
634 microbial homeostasis after birth. *Immunology*. 2020;159(1):15-25. doi:  
635 10.1111/imm.13149.
- 636 21. Tanaka S, Kobayashi T, Songjinda P, Tateyama A, Tsubouchi M, Kiyohara C,  
637 et al. Influence of antibiotic exposure in the early postnatal period on the development  
638 of intestinal microbiota. *FEMS Immunol Med Microbiol*. 2009;56(1):80-7. doi:  
639 10.1111/j.1574-695X.2009.00553.x.
- 640 22. Gasparrini AJ, Wang B, Sun X, Kennedy EA, Hernandez-Leyva A, Ndao IM,  
641 et al. Persistent metagenomic signatures of early-life hospitalization and antibiotic  
642 treatment in the infant gut microbiota and resistome. *Nat Microbiol*. 2019;4(12):2285-  
643 97. doi: 10.1038/s41564-019-0550-2.
- 644 23. Ortqvist AK, Lundholm C, Halfvarson J, Ludvigsson JF, Almquist C. Fetal and  
645 early life antibiotics exposure and very early onset inflammatory bowel disease: a  
646 population-based study. *Gut*. 2019;68(2):218-25. doi: 10.1136/gutjnl-2017-314352.
- 647 Ungaro R, Bernstein CN, Geary R, Hviid A, Kolho KL, Kronman MP, et al.  
648 Antibiotics associated with increased risk of new-onset Crohn's disease but not  
649 ulcerative colitis: a meta-analysis. *Am J Gastroenterol*. 2014;109(11):1728-38. doi:  
650 10.1038/ajg.2014.246.
- 651 25. Shao X, Ding X, Wang B, Li L, An X, Yao Q, et al. Antibiotic exposure in early  
652 life increases risk of childhood obesity: a systematic review and meta-analysis. *Front*  
653 *Endocrinol (Lausanne)*. 2017;8:170. doi: 10.3389/fendo.2017.00170.
- 654 26. Aversa Z, Atkinson EJ, Schafer MJ, Theiler RN, Rocca WA, Blaser MJ, et al.  
655 Association of infant antibiotic exposure with childhood health outcomes. *Mayo Clinic*  
656 *Proceedings*. 2020;96(1):66-77. doi: 10.1016/j.mayocp.2020.07.019.
- 657 27. Langdon A, Crook N, Dantas G. The effects of antibiotics on the microbiome  
658 throughout development and alternative approaches for therapeutic modulation.  
659 *Genome Med*. 2016;8(1):39. doi: 10.1186/s13073-016-0294-z.
- 660 28. Patrick DM, Sbihi H, Dai DLY, Al Mamun A, Rasali D, Rose C, et al.  
661 Decreasing antibiotic use, the gut microbiota, and asthma incidence in children:  
662 evidence from population-based and prospective cohort studies. *Lancet Respir Med*.  
663 2020;8(11):1094-105. doi: 10.1016/S2213-2600(20)30052-7.
- 664 29. Watson VE, Jacob ME, Bruno-Barcena JM, Amirsultan S, Stauffer SH,  
665 Piqueras VO, et al. Influence of the intestinal microbiota on disease susceptibility in

- 666 kittens with experimentally-induced carriage of atypical enteropathogenic *Escherichia*  
667 *coli*. *Vet Microbiol.* 2019;231:197-206. doi: 10.1016/j.vetmic.2019.03.020.
- 668 30. Torres-Henderson C, Summers S, Suchodolski J, Lappin MR. Effect of  
669 *Enterococcus Faecium* strain SF68 on gastrointestinal signs and fecal microbiome in  
670 cats administered amoxicillin-clavulanate. *Top Companion Anim Med.*  
671 2017;32(3):104-8. doi: 10.1053/j.tcam.2017.11.002.
- 672 31. Whittemore JC, Stokes JE, Laia NL, Price JM, Suchodolski JS. Short and long-  
673 term effects of a synbiotic on clinical signs, the fecal microbiome, and metabolomic  
674 profiles in healthy research cats receiving clindamycin: a randomized, controlled trial.  
675 *PeerJ.* 2018;6:e5130. doi: 10.7717/peerj.5130.
- 676 32. Whittemore JC, Stokes JE, Price JM, Suchodolski JS. Effects of a synbiotic on  
677 the fecal microbiome and metabolomic profiles of healthy research cats administered  
678 clindamycin: a randomized, controlled trial. *Gut Microbes.* 2019;10(4):521-39. doi:  
679 10.1080/19490976.2018.1560754.
- 680 33. Abu-Sbeih H, Herrera LN, Tang T, Altan M, Chaftari AP, Okhuysen PC, et al.  
681 Impact of antibiotic therapy on the development and response to treatment of immune  
682 checkpoint inhibitor-mediated diarrhea and colitis. *J Immunother Cancer.*  
683 2019;7(1):242. doi: 10.1186/s40425-019-0714-x.
- 684 34. Laflamme D. Development and validation of a body condition score system for  
685 cats: a clinical tool. *Feline pract.* 1997;25(5/6):13-8.
- 686 35. Laflamme DP, Xu H, Cupp CJ, Kerr WW, Ramadan Z, Long GM. Evaluation  
687 of canned therapeutic diets for the management of cats with naturally occurring chronic  
688 diarrhea. *J Feline Med Surg.* 2012;14(10):669-77. doi: 10.1177/1098612X12446906
- 689 36. Stone AE, Brummet GO, Carozza EM, Kass PH, Petersen EP, Sykes J, et al.  
690 2020 AAHA/AAFP Feline Vaccination Guidelines. *J Feline Med Surg.*  
691 2020;22(9):813-30. doi: 10.1177/1098612X20941784.
- 692 37. Lappin MR, Blondeau J, Boothe D, Breitschwerdt EB, Guardabassi L, Lloyd  
693 DH, et al. Antimicrobial use guidelines for treatment of respiratory tract disease in dogs  
694 and cats: antimicrobial guidelines working group of the International Society for  
695 Companion Animal Infectious Diseases. *J Vet Intern Med.* 2017;31(2):279-94. doi:  
696 10.1111/jvim.14627.
- 697 38. Parada AE, Needham DM, Fuhrman JA. Every base matters: assessing small  
698 subunit rRNA primers for marine microbiomes with mock communities, time series  
699 and global field samples. *Environ Microbiol.* 2016;18(5):1403-14. doi: 10.1111/1462-  
700 2920.13023.
- 701 39. Apprill A, McNally S, Parsons R, Weber L. Minor revision to V4 region SSU  
702 rRNA 806R gene primer greatly increases detection of SAR11 bacterioplankton.  
703 *Aquatic Microbial Ecology.* 2015;75(2):129-37. doi: 10.3354/ame01753.
- 704 40. Bolyen E, Rideout JR, Dillon MR, Bokulich NA, Abnet CC, Al-Ghalith GA, et  
705 al. Reproducible, interactive, scalable and extensible microbiome data science using  
706 QIIME 2. *Nat Biotechnol.* 2019;37(8):852-7. doi: 10.1038/s41587-019-0209-9.
- 707 41. Callahan BJ, McMurdie PJ, Rosen MJ, Han AW, Johnson AJ, Holmes SP.  
708 DADA2: High-resolution sample inference from Illumina amplicon data. *Nat Methods.*  
709 2016;13(7):581-3. doi: 10.1038/nmeth.3869.
- 710 42. Lozupone C, Knight R. UniFrac: a new phylogenetic method for comparing  
711 microbial communities. *Appl Environ Microbiol.* 2005;71(12):8228-35. doi:  
712 10.1128/aem.71.12.8228-8235.2005.
- 713 43. Ritchie LE, Burke KF, Garcia-Mazcorro JF, Steiner JM, Suchodolski JS.  
714 Characterization of fecal microbiota in cats using universal 16S rRNA gene and group-

- 715 specific primers for *Lactobacillus* and *Bifidobacterium* spp. *Vet Microbiol.*  
716 2010;144(1-2):140-6. doi: 10.1016/j.vetmic.2009.12.045
- 717 44. AlShawaqfeh MK, Wajid B, Minamoto Y, Markel M, Lidbury JA, Steiner JM,  
718 et al. A dysbiosis index to assess microbial changes in fecal samples of dogs with  
719 chronic inflammatory enteropathy. *FEMS Microbiol Ecol.* 2017;93(11). doi:  
720 10.1093/femsec/fix136.
- 721 45. Guard BC, Mila H, Steiner JM, Mariani C, Suchodolski JS, Chastant-Maillard  
722 S. Characterization of the fecal microbiome during neonatal and early pediatric  
723 development in puppies. *PLoS One.* 2017;12(4):e0175718. doi:  
724 10.1371/journal.pone.0175718.
- 725 46. Blake AB, Cigarroa A, Klein HL, Khattab MR, Keating T, Van De Coevering  
726 P, et al. Developmental stages in microbiota, bile acids, and clostridial species in  
727 healthy puppies. *J Vet Intern Med.* 2020. doi: 10.1111/jvim.15928.
- 728 47. Tauchi H, Yahagi K, Yamauchi T, Hara T, Yamaoka R, Tsukuda N, et al. Gut  
729 microbiota development of preterm infants hospitalised in intensive care units. *Benef*  
730 *Microbes.* 2019;10(6):641-51. doi: 10.3920/BM2019.0003.
- 731 48. Deusch O, O'Flynn C, Colyer A, Morris P, Allaway D, Jones PG, et al. Deep  
732 Illumina-based shotgun sequencing reveals dietary effects on the structure and function  
733 of the fecal microbiome of growing kittens. *PLoS One.* 2014;9(7):e101021. doi:  
734 10.1371/journal.pone.0101021.
- 735 49. Deusch O, O'Flynn C, Colyer A, Swanson KS, Allaway D, Morris P. A  
736 longitudinal study of the feline faecal microbiome identifies changes into early  
737 adulthood irrespective of sexual development. *PLoS One.* 2015;10(12):e0144881. doi:  
738 10.1371/journal.pone.0144881.
- 739 50. Tierney BT, Yang Z, Luber JM, Beaudin M, Wibowo MC, Baek C, et al. The  
740 landscape of genetic content in the gut and oral human microbiome. *Cell Host Microbe.*  
741 2019;26(2):283-95 e8. doi: 10.1016/j.chom.2019.07.008.
- 742 51. Hooda S, Vester Boler BM, Kerr KR, Dowd SE, Swanson KS. The gut  
743 microbiome of kittens is affected by dietary protein:carbohydrate ratio and associated  
744 with blood metabolite and hormone concentrations. *Br J Nutr.* 2013;109(9):1637-46.  
745 doi: 10.1017/S0007114512003479.
- 746 52. Bermingham EN, Young W, Kittelmann S, Kerr KR, Swanson KS, Roy NC, et  
747 al. Dietary format alters fecal bacterial populations in the domestic cat (*Felis catus*).  
748 *Microbiologyopen.* 2013;2(1):173-81. doi: 10.1002/mbo3.60.
- 749 53. Milani C, Duranti S, Bottacini F, Casey E, Turrone F, Mahony J, et al. The first  
750 microbial colonizers of the human gut: composition, activities, and health implications  
751 of the infant gut microbiota. *Microbiol Mol Biol Rev.* 2017;81(4). doi:  
752 10.1128/MMBR.00036-17.
- 753 54. Moon CD, Young W, Maclean PH, Cookson AL, Bermingham EN.  
754 Metagenomic insights into the roles of Proteobacteria in the gastrointestinal  
755 microbiomes of healthy dogs and cats. *Microbiologyopen.* 2018;7(5):e00677. doi:  
756 10.1002/mbo3.677.
- 757 55. Dogra S, Sakwinska O, Soh SE, Ngom-Bru C, Bruck WM, Berger B, et al.  
758 Dynamics of infant gut microbiota are influenced by delivery mode and gestational  
759 duration and are associated with subsequent adiposity. *mBio.* 2015;6(1). doi:  
760 10.1128/mBio.02419-14.
- 761 56. White AR, Stokes DH, Slocombe B, Sutherland R. Bactericidal effects of  
762 amoxicillin/clavulanic acid and ticarcillin/clavulanic acid in in-vitro kinetic models. *J*  
763 *Antimicrob Chemother.* 1985;15 Suppl A:227-32. doi: 10.1093/jac/15.suppl\_a.227.

- 764 57. Di Caprio R, Lembo S, Di Costanzo L, Balato A, Monfrecola G. Anti-  
765 inflammatory properties of low and high doxycycline doses: an in vitro study.  
766 *Mediators Inflamm.* 2015;2015:329418. doi: 10.1155/2015/329418.
- 767 58. Boynton FDD, Ericsson AC, Uchihashi M, Dunbar ML, Wilkinson JE.  
768 Doxycycline induces dysbiosis in female C57BL/6NCrl mice. *BMC Res Notes.*  
769 2017;10(1):644. doi: 10.1186/s13104-017-2960-7.
- 770 59. Zhang J, Sun Y, Wang R, Zhang J. Gut microbiota-mediated drug-drug  
771 interaction between amoxicillin and aspirin. *Sci Rep.* 2019;9(1):16194. doi:  
772 10.1038/s41598-019-52632-5.
- 773 60. Mulder M, Radjabzadeh D, Kiefte-de Jong JC, Uitterlinden AG, Kraaij R,  
774 Stricker BH, et al. Long-term effects of antimicrobial drugs on the composition of the  
775 human gut microbiota. *Gut Microbes.* 2020;12(1):1795492. doi:  
776 10.1080/19490976.2020.1791677.
- 777 61. Galla S, Chakraborty S, Cheng X, Yeo JY, Mell B, Chiu N, et al. Exposure to  
778 amoxicillin in early life is associated with changes in gut microbiota and reduction in  
779 blood pressure: findings from a study on rat dams and offspring. *J Am Heart Assoc.*  
780 2020;9(2):e014373. doi: 10.1161/JAHA.119.014373.
- 781 62. Graversen KB, Bahl MI, Larsen JM, Ballegaard AR, Licht TR, Bogh KL. Short-  
782 term amoxicillin-induced perturbation of the gut microbiota promotes acute intestinal  
783 immune regulation in brown Norway rats. *Front Microbiol.* 2020;11:496. doi:  
784 10.3389/fmicb.2020.00496.
- 785 63. Zaura E, Brandt BW, Teixeira de Mattos MJ, Buijs MJ, Caspers MP, Rashid  
786 MU, et al. Same exposure but two radically different responses to antibiotics: resilience  
787 of the salivary microbiome versus long-term microbial shifts in feces. *mBio.*  
788 2015;6(6):e01693-15. doi: 10.1128/mBio.01693-15.
- 789 64. Jung JY, Ahn Y, Khare S, Gokulan K, Pineiro SA, Cerniglia CE. An in vitro  
790 study to assess the impact of tetracycline on the human intestinal microbiome.  
791 *Anaerobe.* 2018;49:85-94. doi: 10.1016/j.anaerobe.2017.12.011.
- 792 65. Liu L, Wang Q, Lin H, Das R, Wang S, Qi H, et al. Amoxicillin increased  
793 functional pathway genes and beta-lactam resistance genes by pathogens bloomed in  
794 intestinal microbiota using a simulator of the human intestinal microbial ecosystem.  
795 *Front Microbiol.* 2020;11:1213. doi: 10.3389/fmicb.2020.01213.
- 796 66. Gendrin M, Yerbanga RS, Ouedraogo JB, Lefevre T, Cohuet A, Christophides  
797 GK. Differential effects of azithromycin, doxycycline, and cotrimoxazole in ingested  
798 blood on the vectorial capacity of malaria mosquitoes. *Open Forum Infect Dis.*  
799 2016;3(2):ofw074. doi: 10.1093/ofid/ofw074.
- 800 67. Becker E, Schmidt TSB, Bengs S, Poveda L, Opitz L, Atrott K, et al. Effects of  
801 oral antibiotics and isotretinoin on the murine gut microbiota. *Int J Antimicrob Agents.*  
802 2017;50(3):342-51. doi: 10.1016/j.ijantimicag.2017.03.017.
- 803 68. Nobel YR, Cox LM, Kirigin FF, Bokulich NA, Yamanishi S, Teitler I, et al.  
804 Metabolic and metagenomic outcomes from early-life pulsed antibiotic treatment. *Nat*  
805 *Commun.* 2015;6:7486. doi: 10.1038/ncomms8486.
- 806 69. Abeles SR, Jones MB, Santiago-Rodriguez TM, Ly M, Klitgord N, Yooseph S,  
807 et al. Microbial diversity in individuals and their household contacts following typical  
808 antibiotic courses. *Microbiome.* 2016;4(1):39. doi: 10.1186/s40168-016-0187-9.
- 809 70. MacPherson CW, Mathieu O, Tremblay J, Champagne J, Nantel A, Girard SA,  
810 et al. Gut bacterial microbiota and its resistome rapidly recover to basal state levels  
811 after short-term amoxicillin-clavulanic acid treatment in healthy adults. *Sci Rep.*  
812 2018;8(1):11192. doi: 10.1038/s41598-018-29229-5.

- 813 71. Kabbani TA, Pallav K, Dowd SE, Villafuerte-Galvez J, Vanga RR, Castillo NE,  
814 et al. Prospective randomized controlled study on the effects of *Saccharomyces*  
815 *boulardii* CNCM I-745 and amoxicillin-clavulanate or the combination on the gut  
816 microbiota of healthy volunteers. *Gut Microbes*. 2017;8(1):17-32. doi:  
817 10.1080/19490976.2016.1267890.
- 818 72. Korpela K, Salonen A, Saxen H, Nikkonen A, Peltola V, Jaakkola T, et al.  
819 Antibiotics in early life associate with specific gut microbiota signatures in a  
820 prospective longitudinal infant cohort. *Pediatr Res*. 2020;88(3):438-43. doi:  
821 10.1038/s41390-020-0761-5.
- 822 73. Kaakoush NO. Insights into the Role of Erysipelotrichaceae in the Human Host.  
823 *Front Cell Infect Microbiol*. 2015;5:84. doi: 10.3389/fcimb.2015.00084.
- 824 74. Baars A, Oosting A, Knol J, Garssen J, van Bergenhenegouwen J. The Gut  
825 Microbiota as a Therapeutic Target in IBD and Metabolic Disease: A Role for the Bile  
826 Acid Receptors FXR and TGR5. *Microorganisms*. 2015;3(4):641-66. doi:  
827 10.3390/microorganisms3040641.
- 828 75. Li Q, Larouche-Lebel E, Loughran KA, Huh TP, Suchodolski JS, Oyama MA.  
829 Gut dysbiosis and its associations with gut microbiota-derived metabolites in dogs with  
830 myxomatous mitral valve disease. *mSystems*. 2021;6(2). doi:  
831 10.1128/mSystems.00111-21.
- 832 76. Costantini L, Molinari R, Farinon B, Merendino N. Impact of omega-3 fatty  
833 acids on the gut microbiota. *Int J Mol Sci*. 2017;18(12). doi: 10.3390/ijms18122645.
- 834 77. Parada Venegas D, De la Fuente MK, Landskron G, Gonzalez MJ, Quera R,  
835 Dijkstra G, et al. Short chain fatty acids (SCFAs)-mediated gut epithelial and immune  
836 regulation and its relevance for inflammatory bowel diseases. *Front Immunol*.  
837 2019;10:277. doi: 10.3389/fimmu.2019.00277.
- 838 78. Oliphant K, Allen-Vercoe E. Macronutrient metabolism by the human gut  
839 microbiome: major fermentation by-products and their impact on host health.  
840 *Microbiome*. 2019;7(1):91. doi: 10.1186/s40168-019-0704-8.
- 841 79. Ramadan Z, Xu H, Laflamme D, Czarnecki-Maulden G, Li QJ, Labuda J, et al.  
842 Fecal microbiota of cats with naturally occurring chronic diarrhea assessed using 16S  
843 rRNA gene 454-pyrosequencing before and after dietary treatment. *J Vet Intern Med*.  
844 2014;28(1):59-65. doi: 10.1111/jvim.12261.
- 845 80. Suchodolski JS, Foster ML, Sohail MU, Leutenegger C, Queen EV, Steiner JM,  
846 et al. The fecal microbiome in cats with diarrhea. *PLoS One*. 2015;10(5):e0127378.  
847 doi: 10.1371/journal.pone.0127378.
- 848 81. Lange K, Buerger M, Stallmach A, Bruns T. Effects of antibiotics on gut  
849 Microbiota. *Dig Dis*. 2016;34(3):260-8. doi: 10.1159/000443360.
- 850 82. Igarashi H, Maeda S, Ohno K, Horigome A, Odamaki T, Tsujimoto H. Effect  
851 of oral administration of metronidazole or prednisolone on fecal microbiota in dogs.  
852 *PLoS One*. 2014;9(9):e107909. doi: 10.1371/journal.pone.0107909.
- 853 83. Gronvold AM, L'Abée-Lund TM, Sorum H, Skancke E, Yannarell AC, Mackie  
854 RI. Changes in fecal microbiota of healthy dogs administered amoxicillin. *FEMS*  
855 *Microbiol Ecol*. 2010;71(2):313-26. doi: 10.1111/j.1574-6941.2009.00808.x.
- 856 84. Suchodolski JS, Dowd SE, Westermarck E, Steiner JM, Wolcott RD, Spillmann  
857 T, et al. The effect of the macrolide antibiotic tylosin on microbial diversity in the  
858 canine small intestine as demonstrated by massive parallel 16S rDNA sequencing.  
859 *BMC Microbiology*. 2009;2(9):210. doi: 10.1186/1471-2180-9-210.
- 860 85. Manchester AC, Webb CB, Blake AB, Sarwar F, Lidbury JA, Steiner JM, et al.  
861 Long-term impact of tylosin on fecal microbiota and fecal bile acids of healthy dogs. *J*  
862 *Vet Intern Med*. 2019;33(6):2605-17. doi: 10.1111/jvim.15635.

- 863 86. Xenoulis PG, Palculict B, Allenspach K, Steiner JM, Van House AM,  
864 Suchodolski JS. Molecular-phylogenetic characterization of microbial communities  
865 imbalances in the small intestine of dogs with inflammatory bowel disease. *Fems*  
866 *Microbiol Ecol.* 2008;66:579-89. doi: 10.1111/j.1574-6941.2008.00556.x.
- 867 87. Suchodolski JS, Xenoulis PG, Paddock CG, Steiner JM, Jergens AE. Molecular  
868 analysis of the bacterial microbiota in duodenal biopsies from dogs with idiopathic  
869 inflammatory bowel disease. *Vet Microbiol.* 2010;142(3-4):394-400. doi:  
870 10.1016/j.vetmic.2009.11.002.
- 871 88. Suchodolski JS, Dowd SE, Wilke V, Steiner JM, Jergens AE. 16S rRNA gene  
872 pyrosequencing reveals bacterial dysbiosis in the duodenum of dogs with idiopathic  
873 inflammatory bowel disease. *PLoS One.* 2012;7(6):e39333. doi:  
874 10.1371/journal.pone.0039333.
- 875 89. Minamoto Y, Otoni CC, Steelman SM, Buyukleblebici O, Steiner JM, Jergens  
876 AE, et al. Alteration of the fecal microbiota and serum metabolite profiles in dogs with  
877 idiopathic inflammatory bowel disease. *Gut Microbes.* 2015;6(1):33-47. doi:  
878 10.1080/19490976.2014.997612.
- 879 90. Bresciani F, Minamoto Y, Suchodolski JS, Galiazzo G, Vecchiato CG, Pinna  
880 C, et al. Effect of an extruded animal protein-free diet on fecal microbiota of dogs with  
881 food-responsive enteropathy. *J Vet Intern Med.* 2018;32(6):1903-10. doi:  
882 10.1111/jvim.15227.
- 883 91. Kalenyak K, Isaiah A, Heilmann RM, Suchodolski JS, Burgener IA.  
884 Comparison of the intestinal mucosal microbiota in dogs diagnosed with idiopathic  
885 inflammatory bowel disease and dogs with food-responsive diarrhea before and after  
886 treatment. *FEMS Microbiol Ecol.* 2018;94(2). doi: 10.1093/femsec/fix173.
- 887 92. Inness VL, McCartney AL, Khoo C, Gross KL, Gibson GR. Molecular  
888 characterisation of the gut microflora of healthy and inflammatory bowel disease cats  
889 using fluorescence in situ hybridisation with special reference to *Desulfovibrio* spp. *J*  
890 *Anim Physiol Anim Nutr.* 2007;91(1-2):48-53. doi: 10.1111/j.14390396.2006.00640.x.
- 891 93. Janeczko S, Atwater D, Bogel E, Greiter-Wilke A, Gerold A, Baumgart M, et  
892 al. The relationship of mucosal bacteria to duodenal histopathology, cytokine mRNA,  
893 and clinical disease activity in cats with inflammatory bowel disease. *Vet Microbiol.*  
894 2008;128(1-2):178-93. doi: 10.1016/j.vetmic.2007.10.014.
- 895 94. Hoehne SN, McDonough SP, Rishniw M, Simpson KW. Identification of  
896 mucosa-invading and intravascular bacteria in feline small intestinal lymphoma. *Vet*  
897 *Pathol.* 2017;54(2):234-41. doi: 10.1177/0300985816664792.
- 898 95. Schmidt M, Unterer S, Suchodolski JS, Honneffer JB, Guard BC, Lidbury JA,  
899 et al. The fecal microbiome and metabolome differs between dogs fed Bones and Raw  
900 Food (BARF) diets and dogs fed commercial diets. *PLoS One.* 2018;13(8):e0201279.  
901 doi: 10.1371/journal.pone.0201279.
- 902 96. Subramanian S, Huq S, Yatsunenkov T, Haque R, Mahfuz M, Alam MA, et al.  
903 Persistent gut microbiota immaturity in malnourished Bangladeshi children. *Nature.*  
904 2014;510(7505):417-21. doi: 10.1038/nature13421.
- 905 97. Mueller NT, Bakacs E, Combellick J, Grigoryan Z, Dominguez-Bello MG. The  
906 infant microbiome development: mom matters. *Trends Mol Med.* 2015;21(2):109-17.  
907 doi: 10.1016/j.molmed.2014.12.002.
- 908 98. Young W, Moon CD, Thomas DG, Cave NJ, Bermingham EN. Pre- and post-  
909 weaning diet alters the faecal metagenome in the cat with differences in vitamin and  
910 carbohydrate metabolism gene abundances. *Sci Rep.* 2016;6:34668. doi:  
911 10.1038/srep34668.



912

## 913 **Supporting information**

914 **S1 Fig. Beta diversity indices among groups.** A) Principal Coordinate  
915 Analysis of unweighted UniFrac distances of 16S rRNA genes representing the  
916 difference in microbial communities among cats treated with amoxicillin clavulanic  
917 acid (blue circles), cats treated with doxycycline (yellow circles), and healthy control  
918 cats (red circles) on days 20/28 (last day of treatment), 60, 120, and 300. B) Principal  
919 Coordinate Analysis of weighted UniFrac distances of 16S rRNA genes representing  
920 the difference in microbial communities among cats treated with amoxicillin  
921 clavulanic acid (blue circles), cats treated with doxycycline (yellow circles), and  
922 healthy control cats (red circles) on days 20/28 (last day of treatment), 60, 120, and  
923 300.

924 **S1 Table. Summary statistics of sequencing data describing the mean**  
925 **percent and standard deviation of sequences belonging to antibiotic-treated**  
926 **(AMC and DOX groups) and healthy (CON group) cats.**

927 **S2 Table. Summary statistics of qPCR data describing the mean log**  
928 **abundance and standard deviation of bacterial groups belonging to antibiotic-**  
929 **treated (AMC and DOX groups) and healthy (CON group) cats.**

930 **S3 Table. Alpha diversity metrics (mean  $\pm$  standard deviation). CON,**  
931 **healthy cats that did not receive antibiotics; AMC, cats treated with**  
932 **amoxicillin/clavulanic acid for 20 days; DOX, cats treated with doxycycline for**  
933 **28 days.**

934           **S4 Table: Beta diversity differences. CON, healthy cats that did not**  
935   **receive antibiotics; AMC, cats treated with amoxicillin/clavulanic acid for 20**  
936   **days; DOX, cats treated with doxycycline for 28 days.**

937

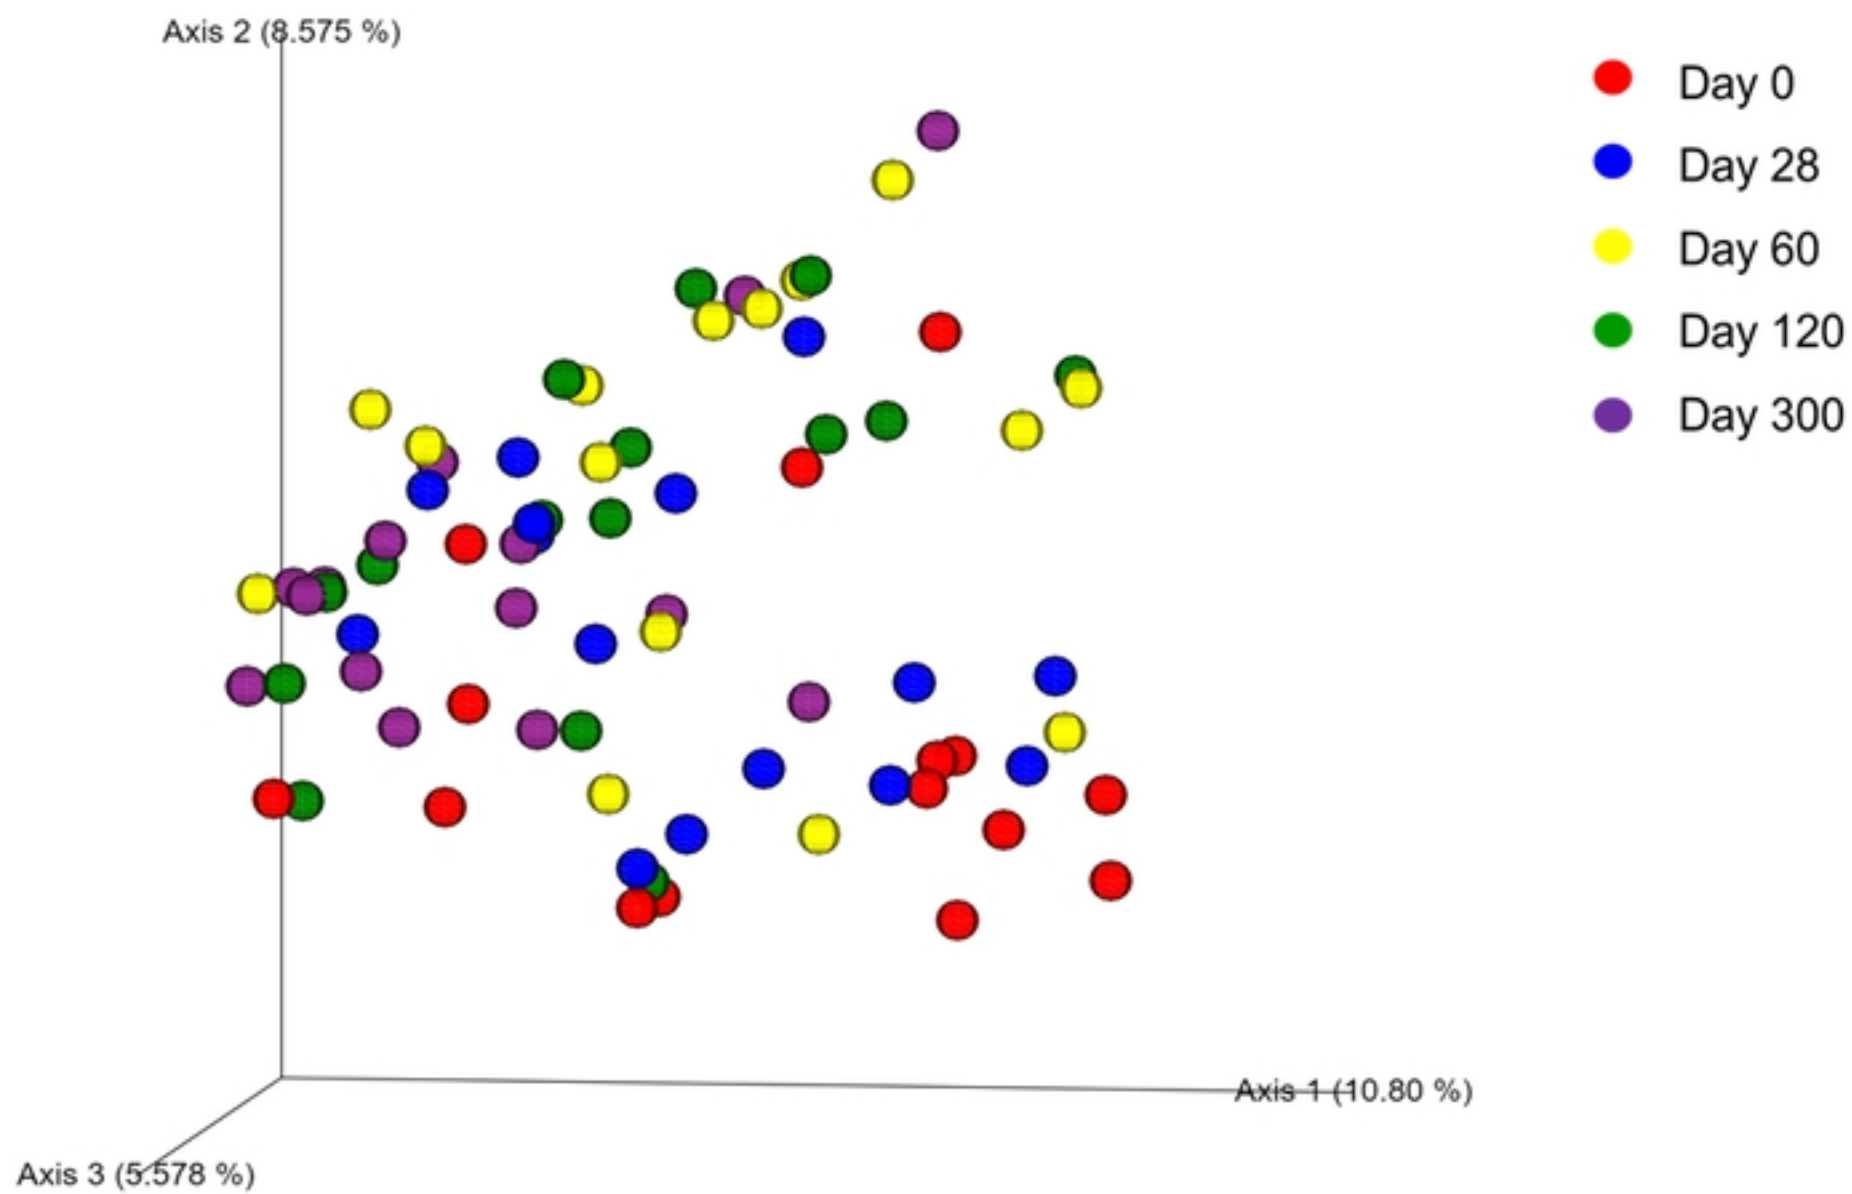

Fig1

$p = 0.009$

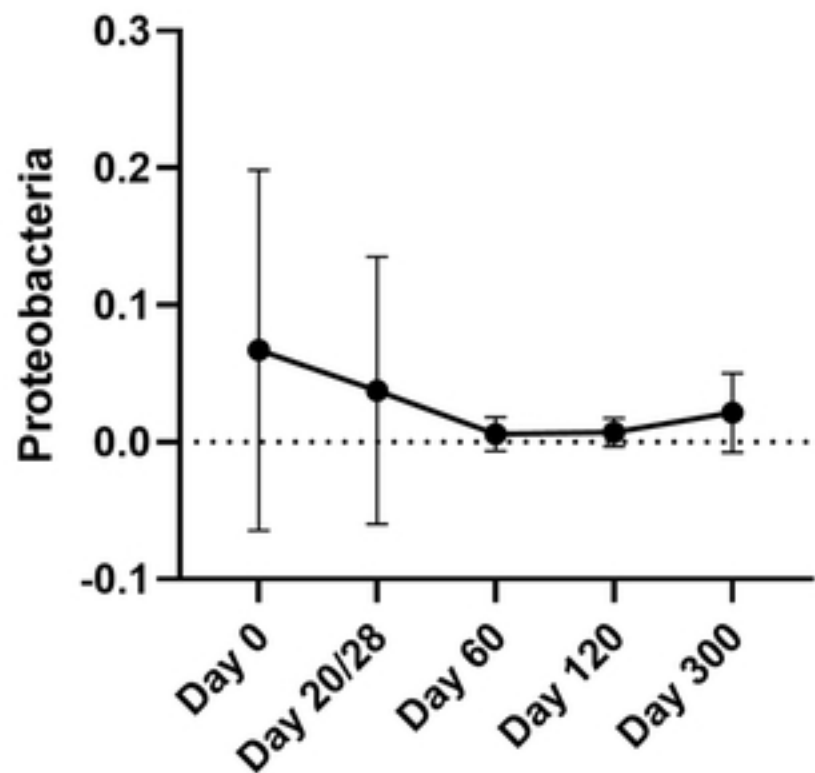

$p < 0.001$

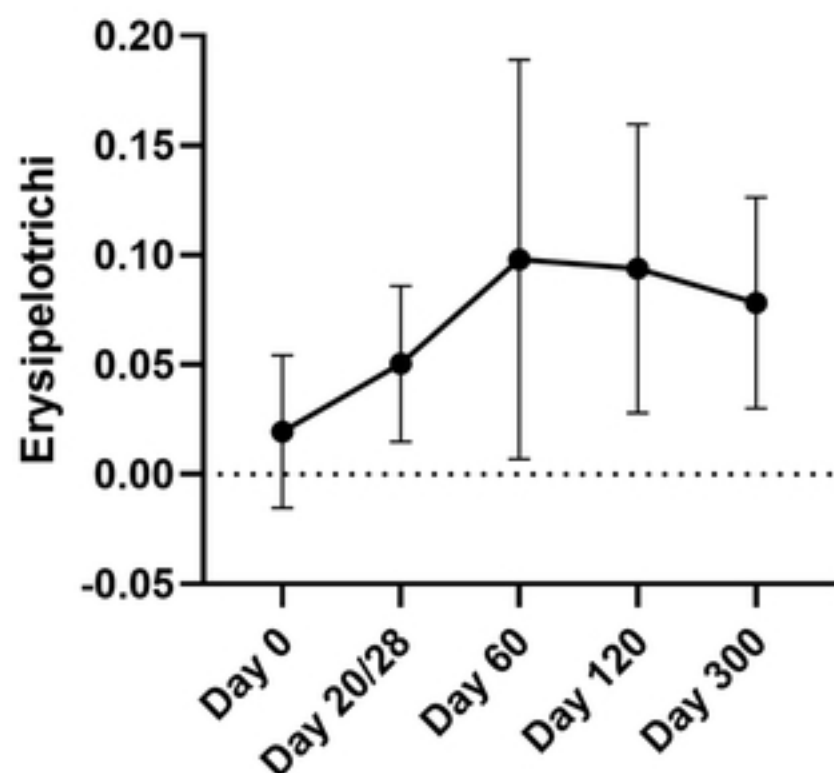

$p = 0.018$

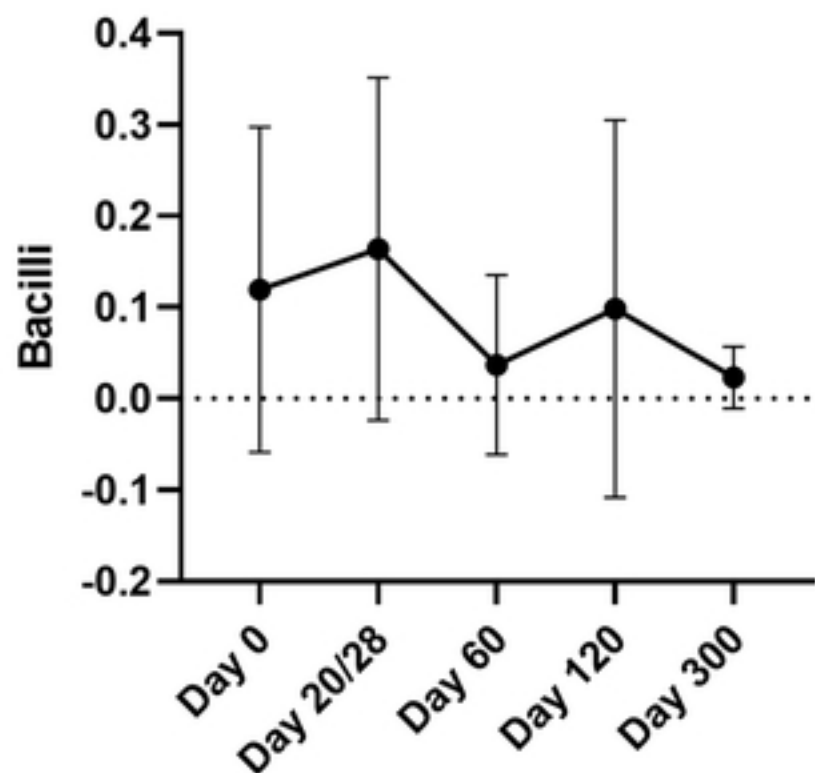

$p = 0.002$

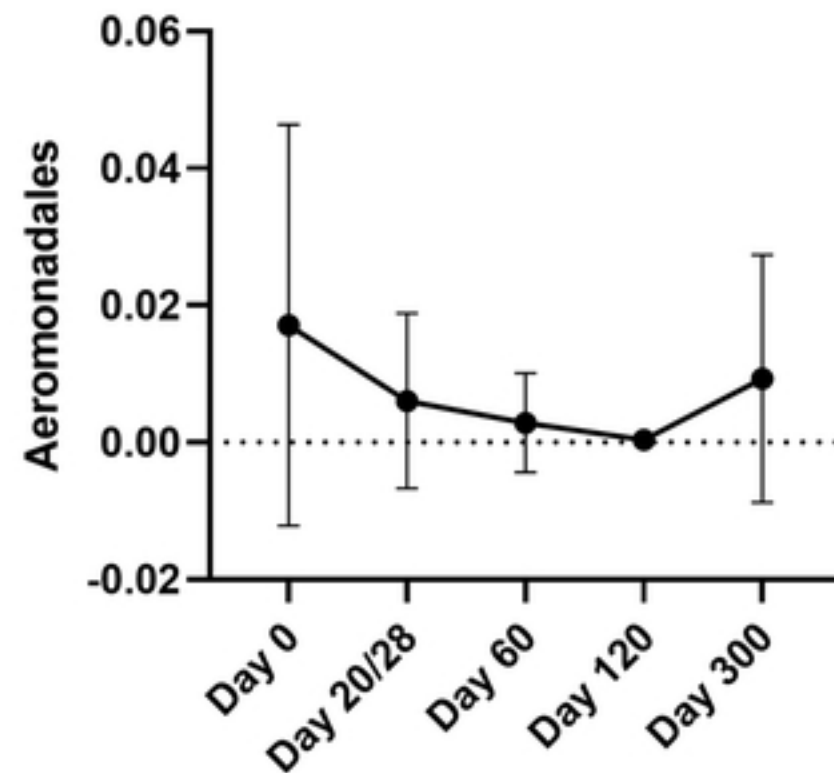

Fig2

**p < 0.001**

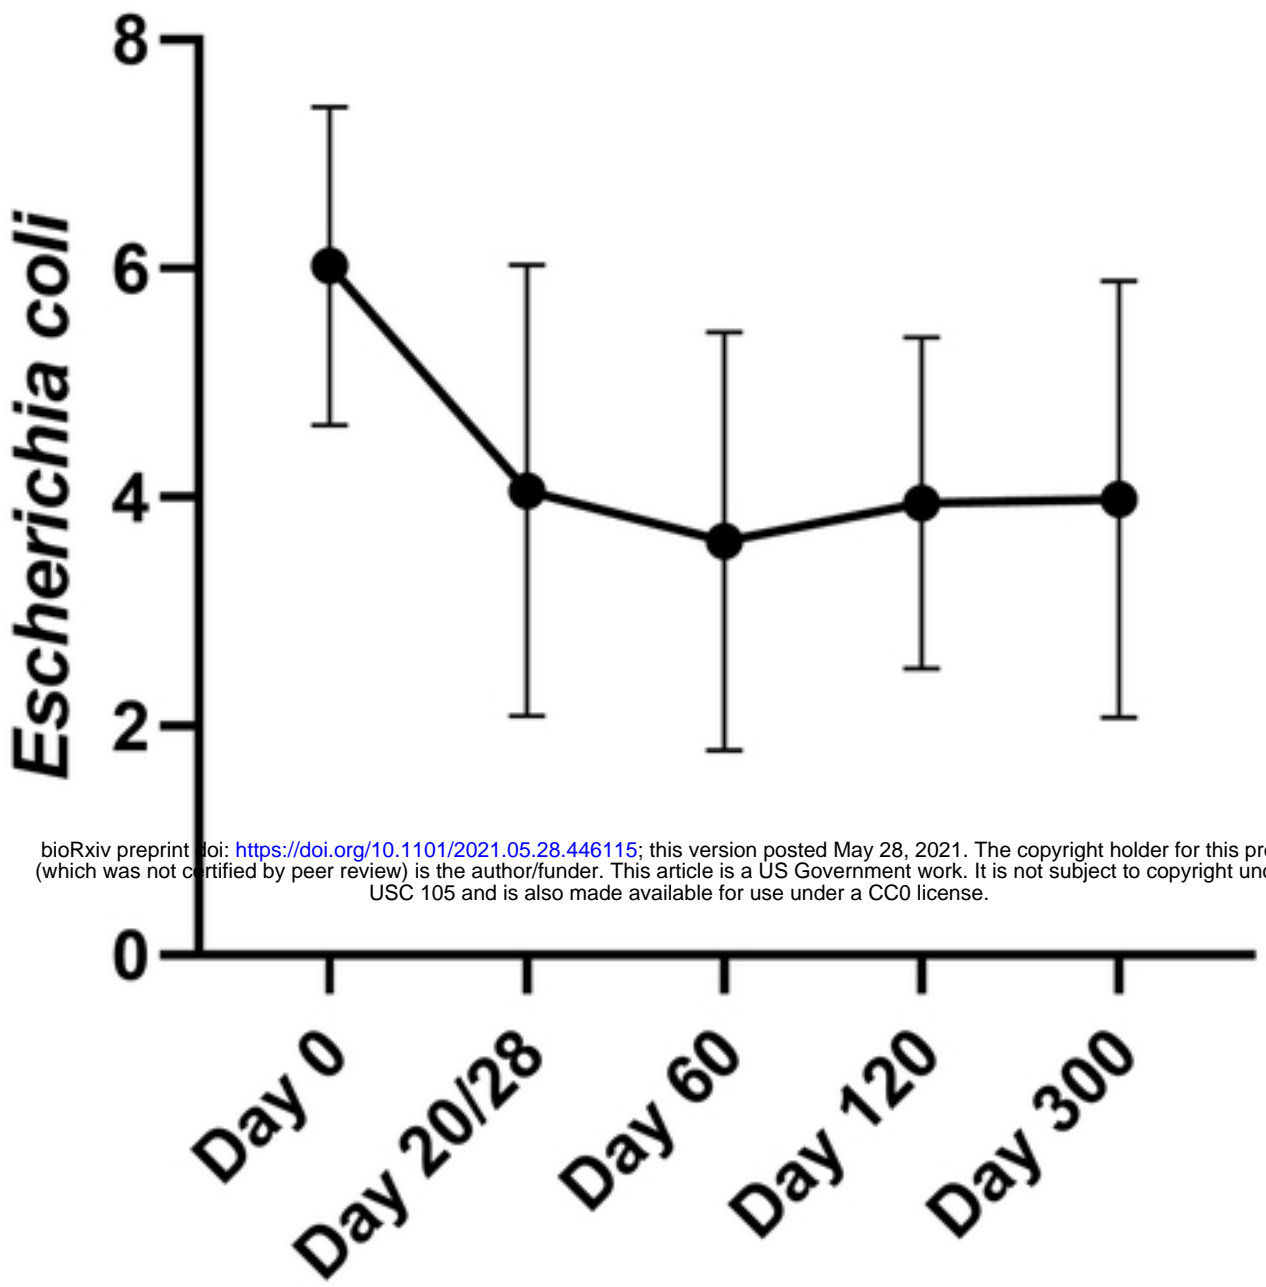

bioRxiv preprint doi: <https://doi.org/10.1101/2021.05.28.446115>; this version posted May 28, 2021. The copyright holder for this preprint (which was not certified by peer review) is the author/funder. This article is a US Government work. It is not subject to copyright under 17 USC 105 and is also made available for use under a CC0 license.

**p = 0.032**

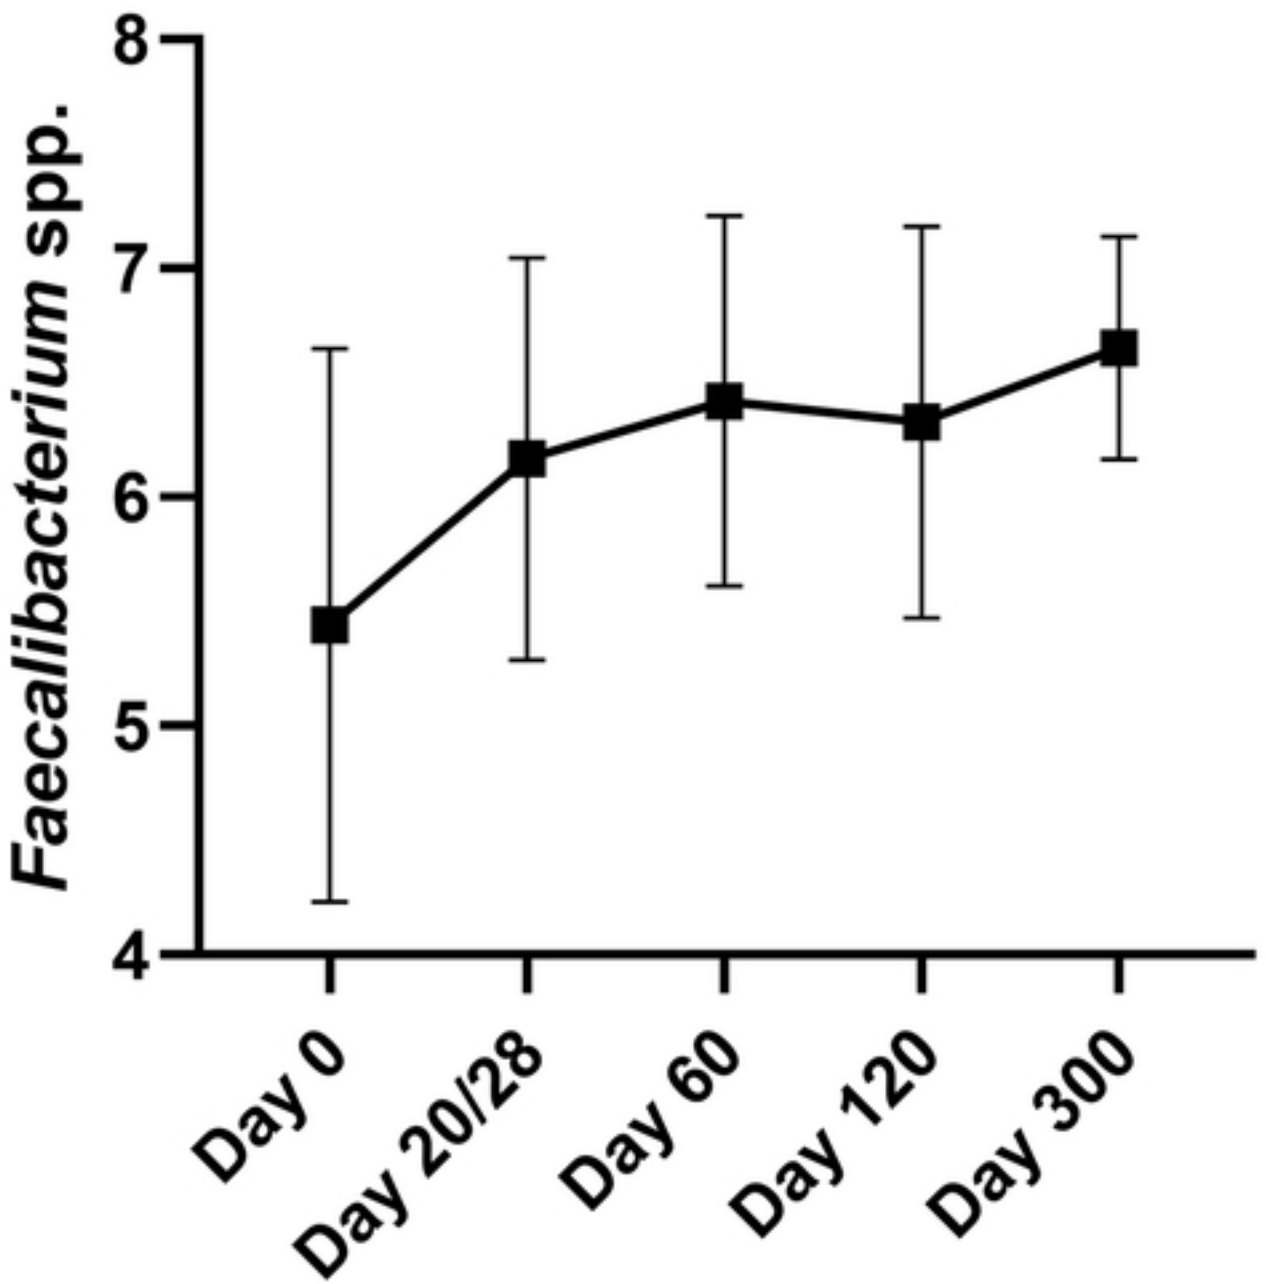

Fig3

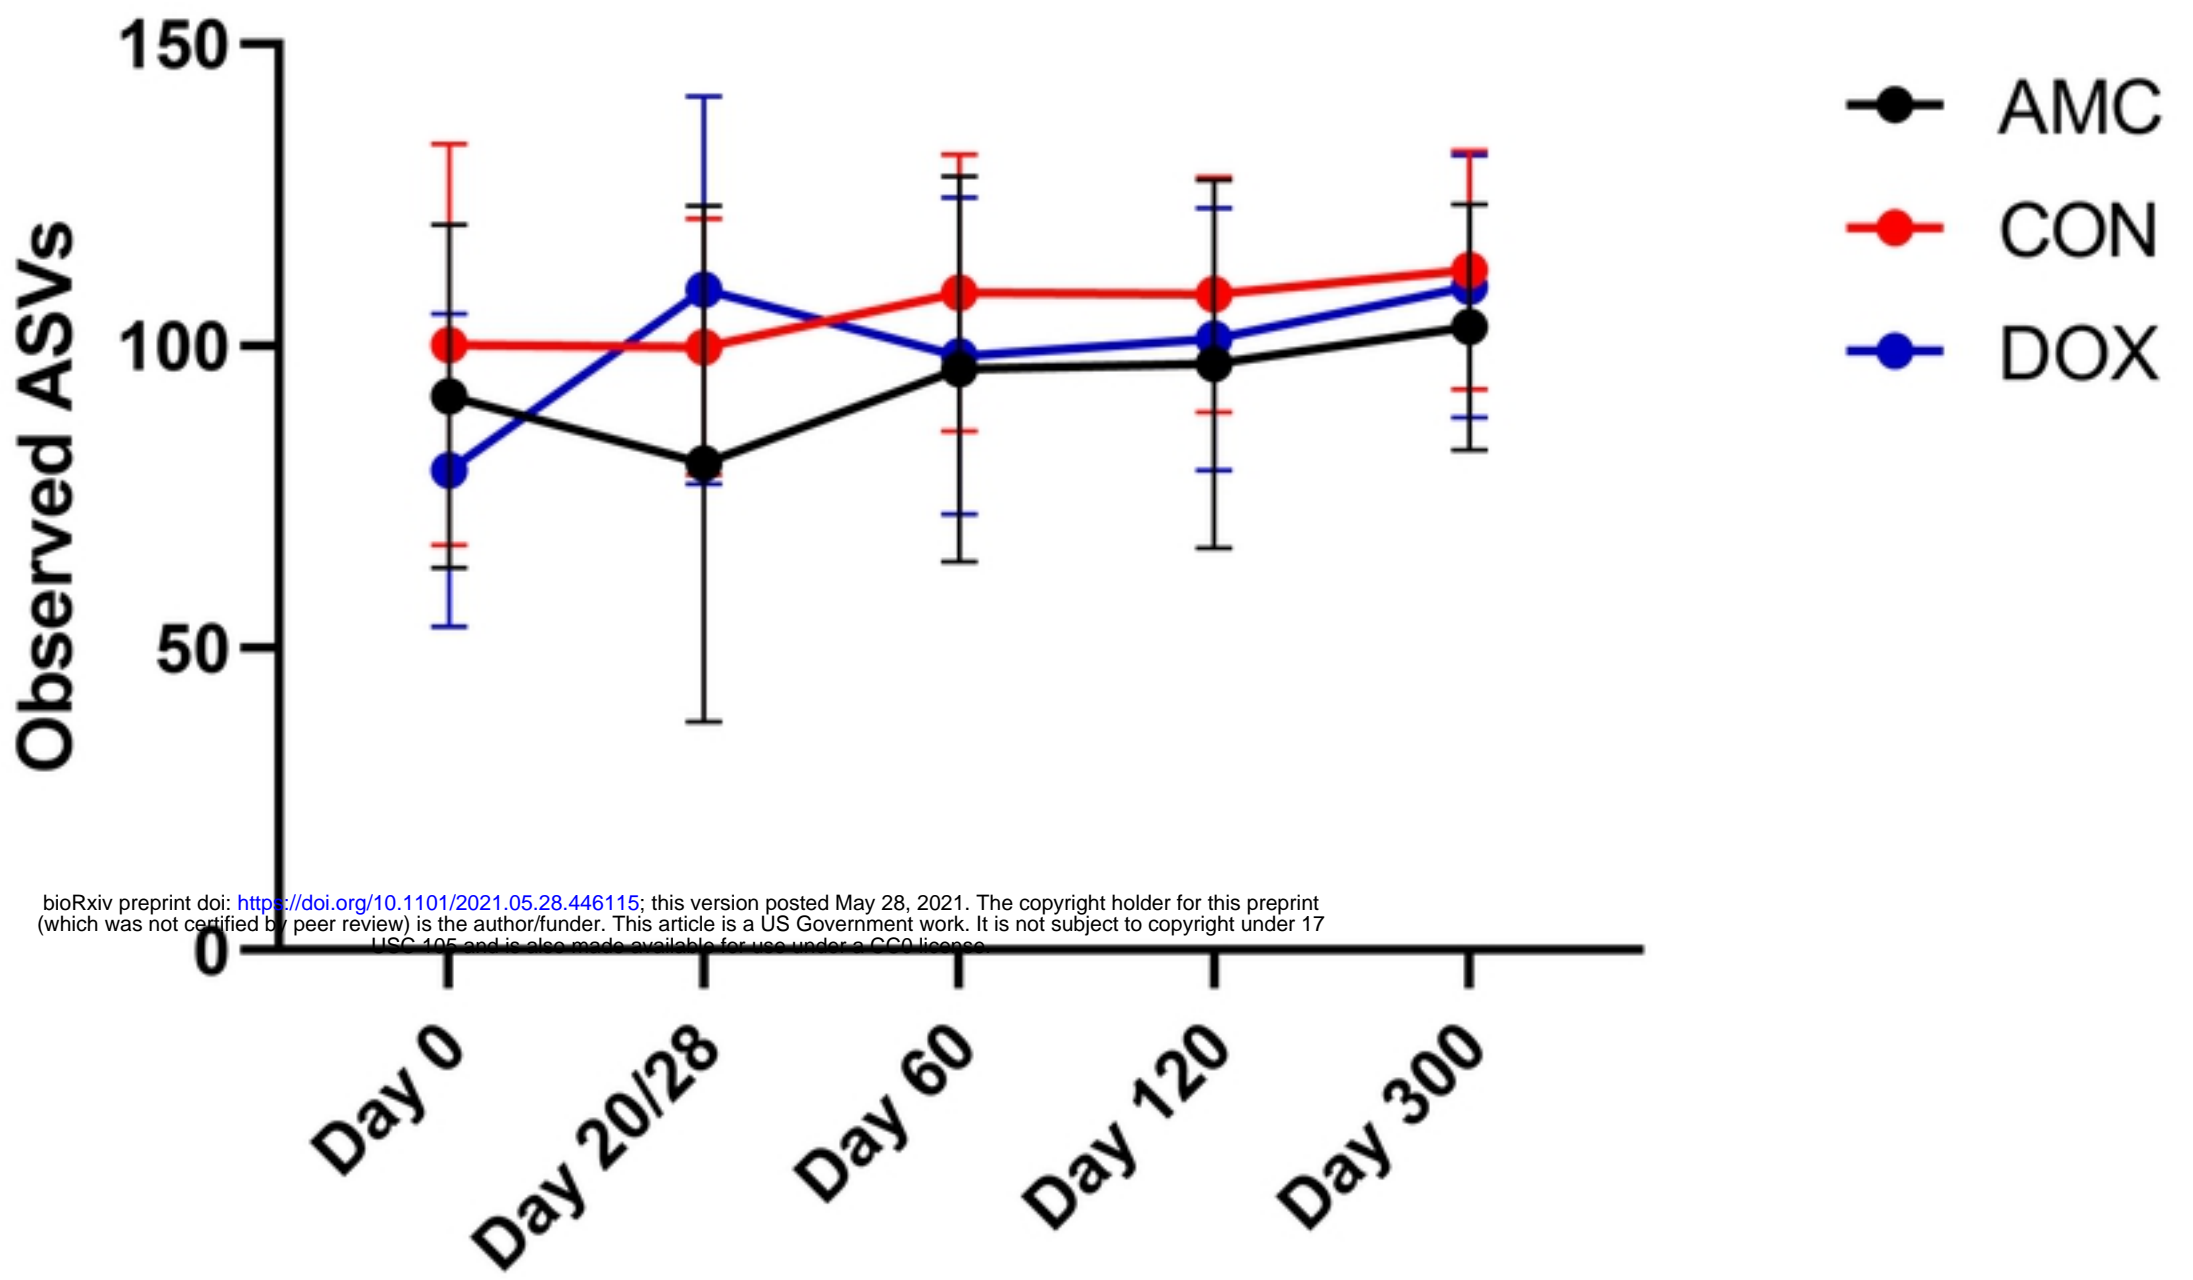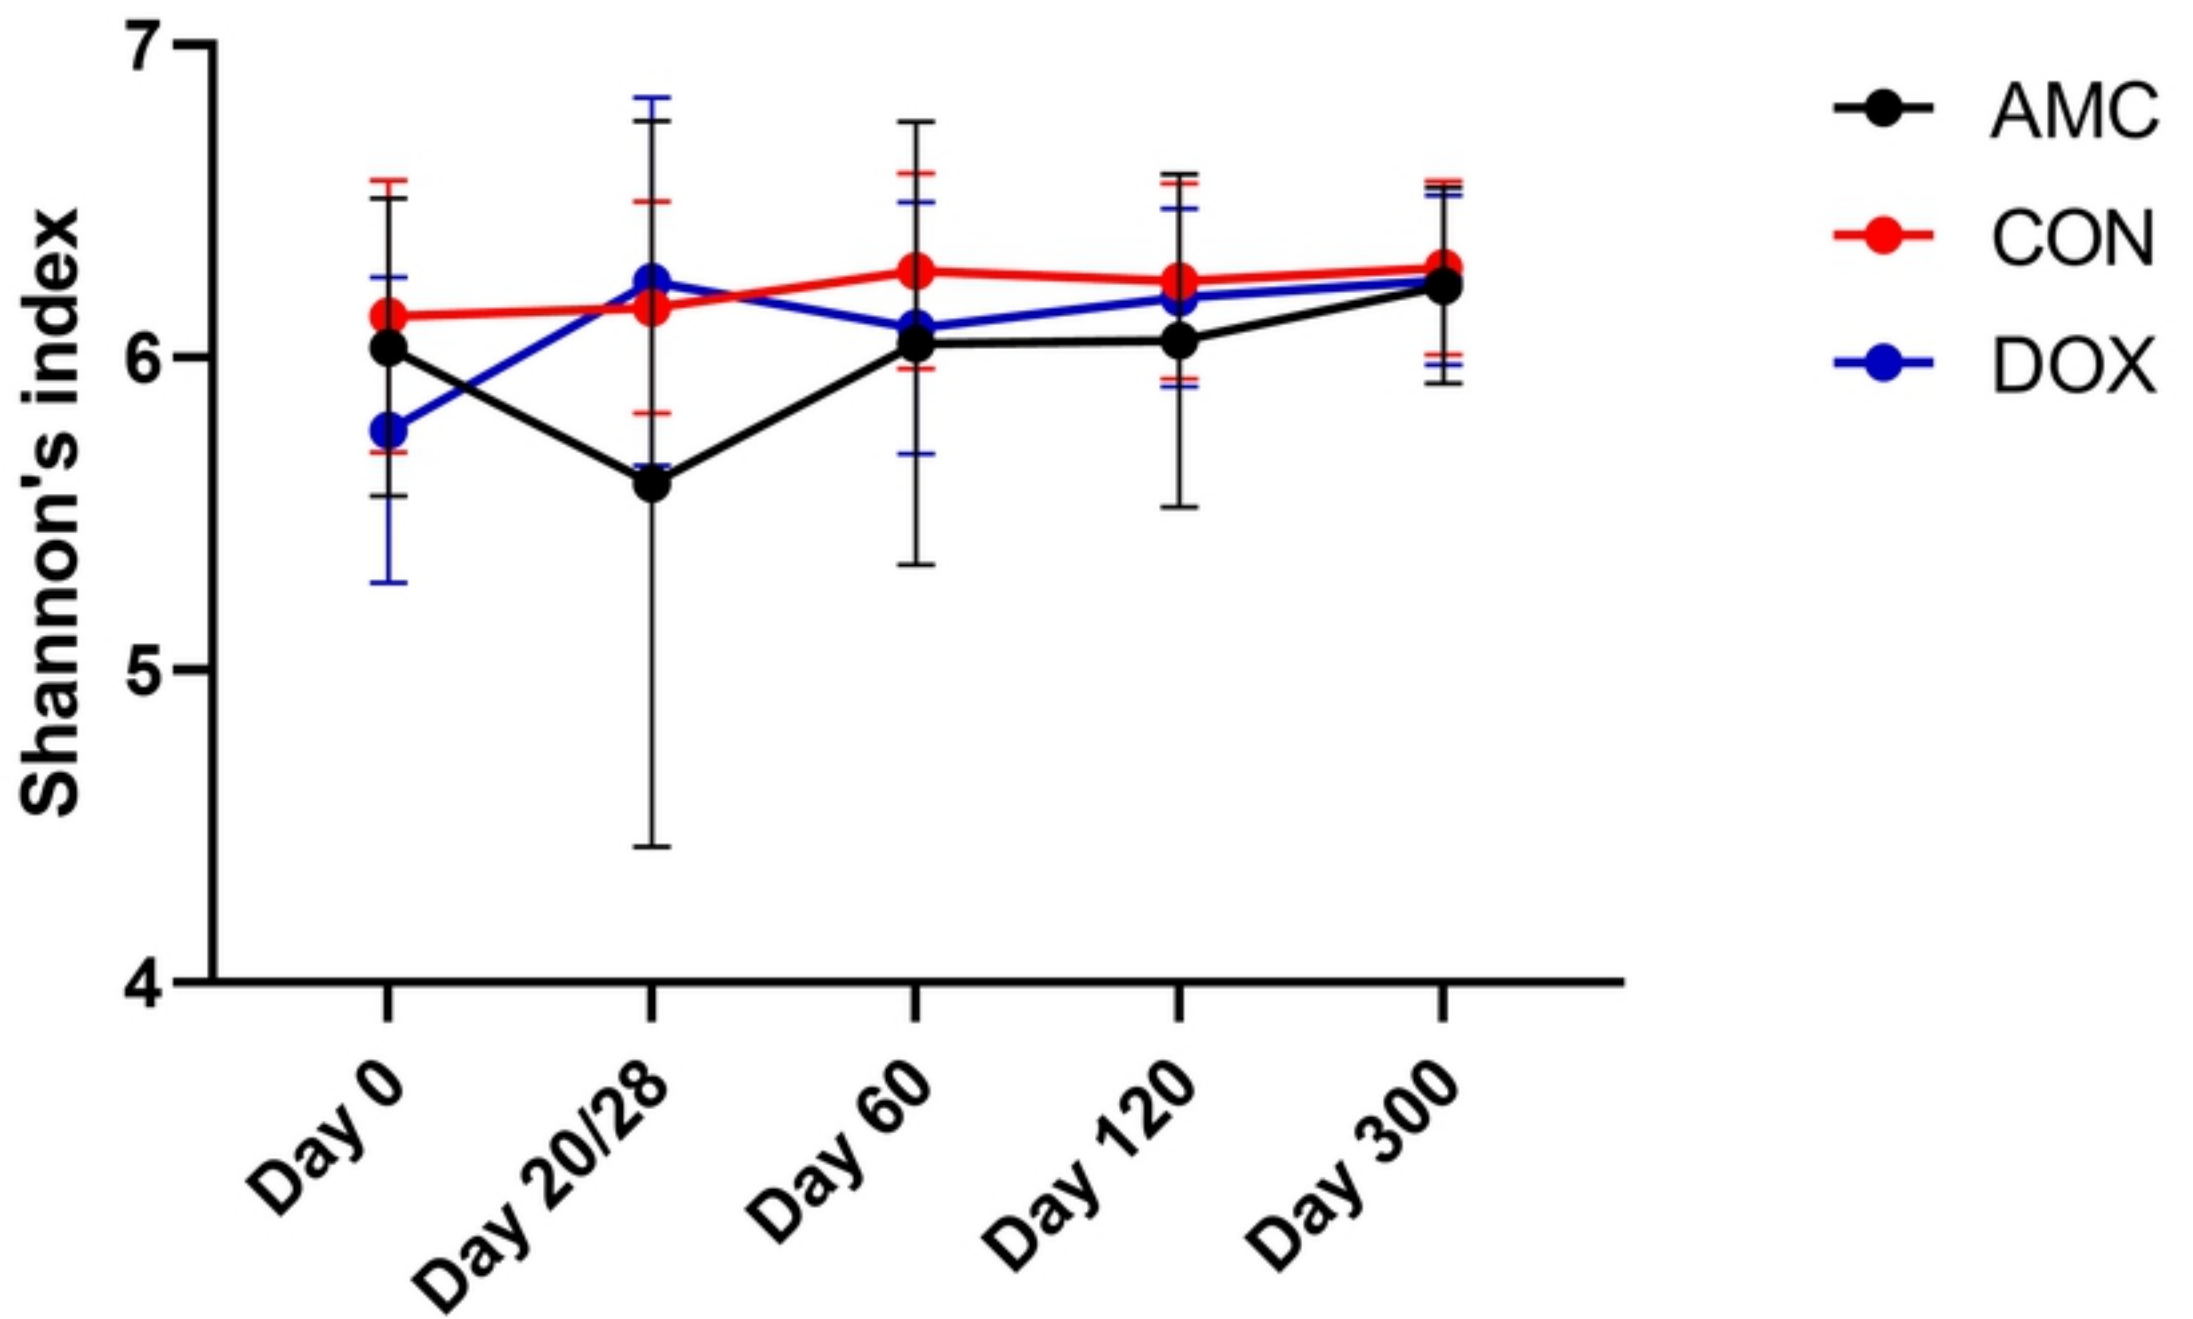

Fig4

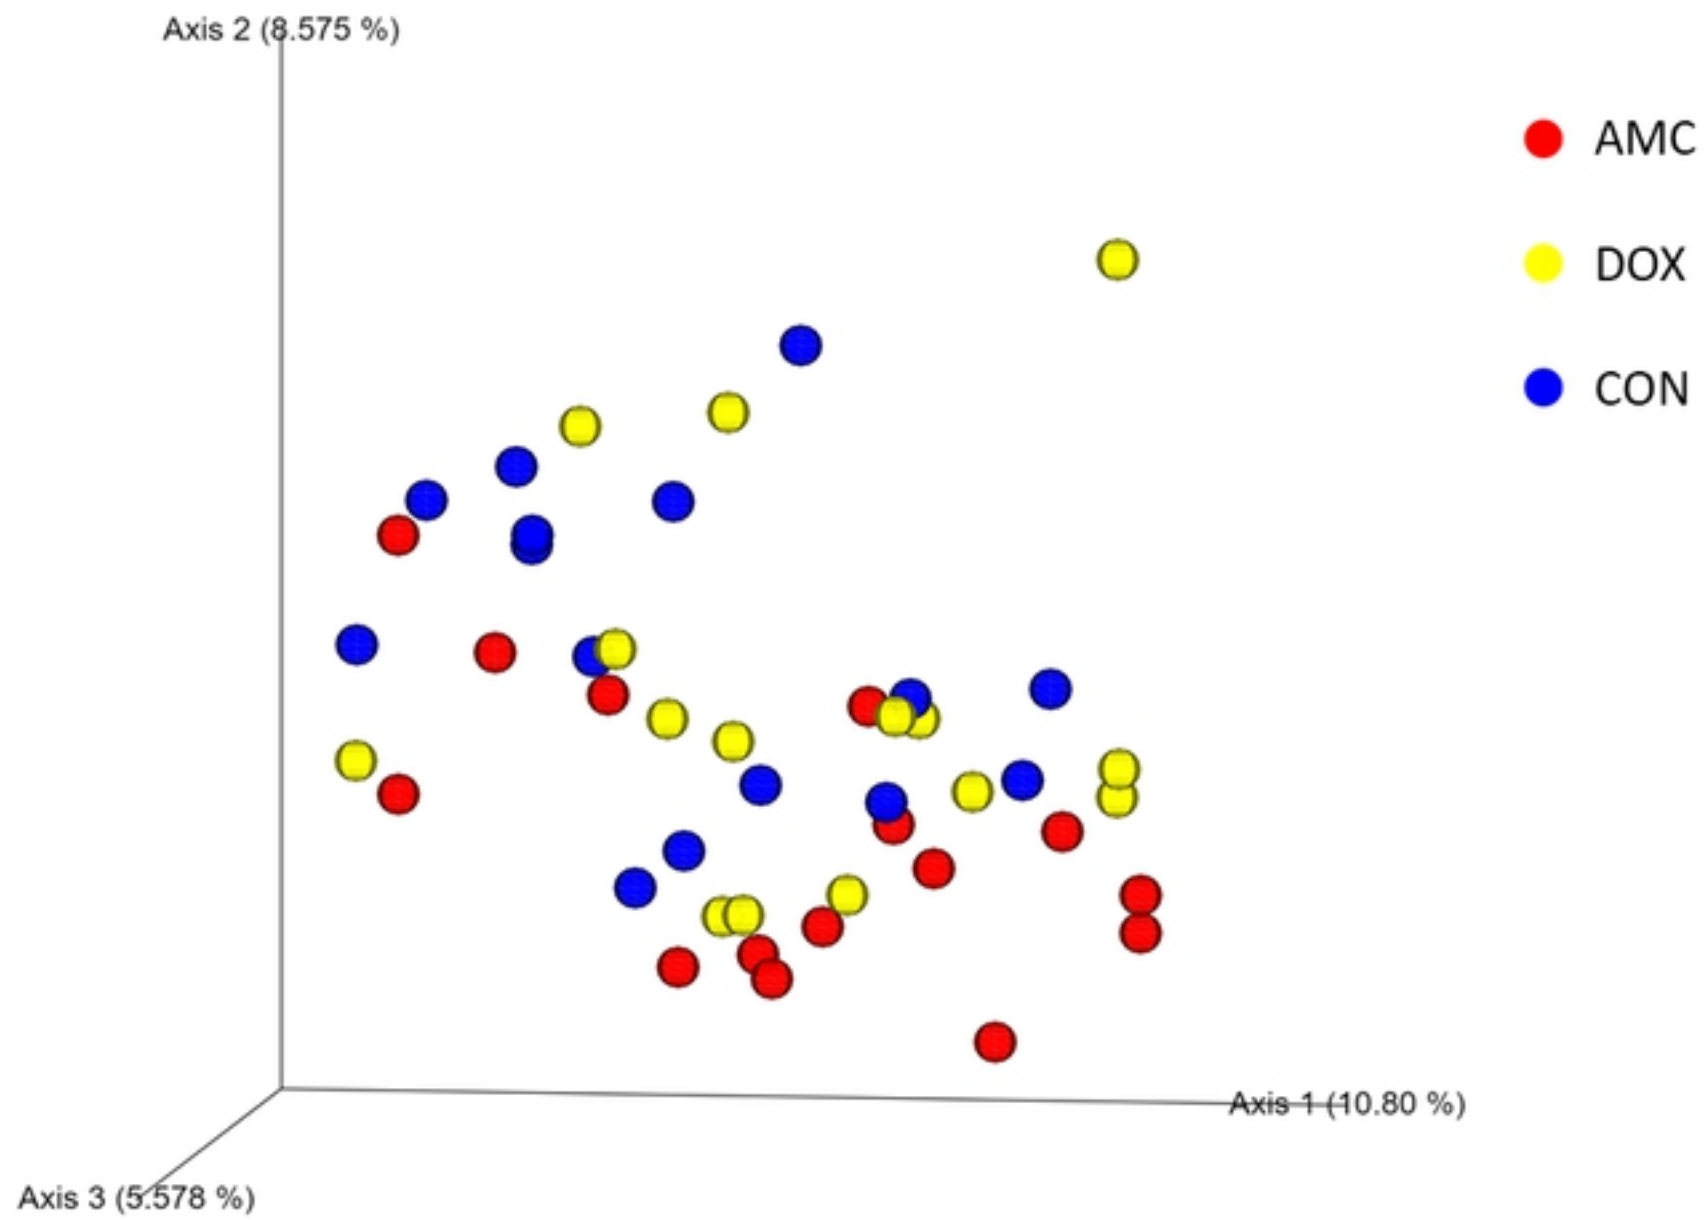

Fig5

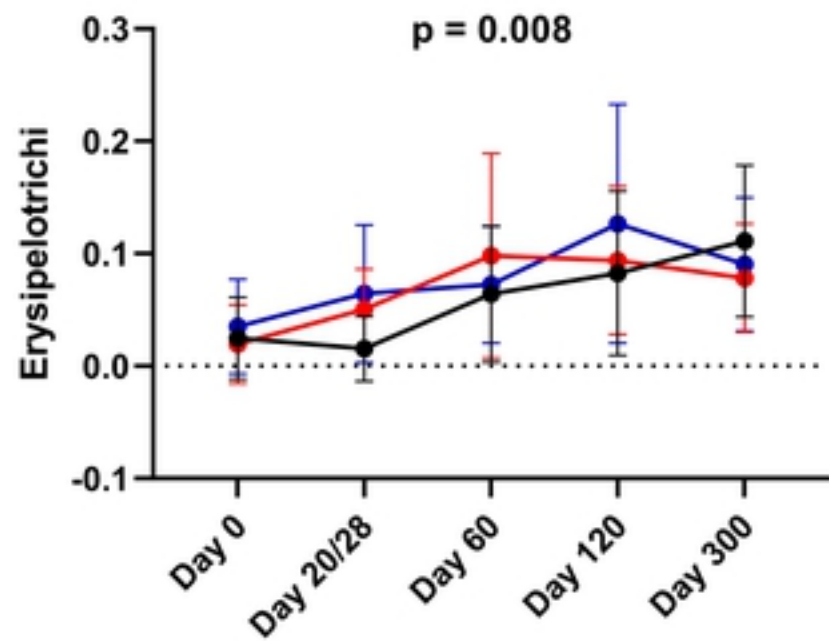

● AMC  
● CON  
● DOX

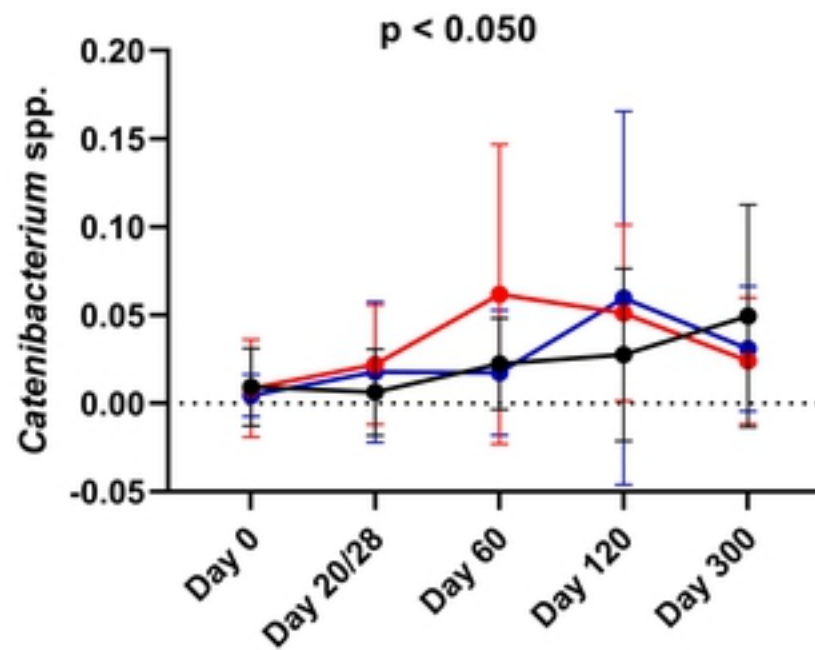

● AMC  
● CON  
● DOX

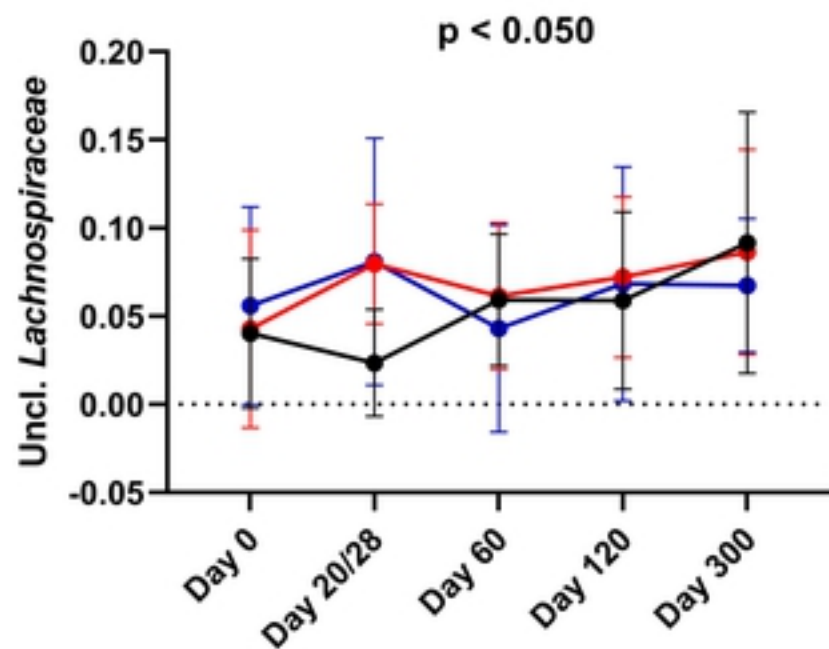

● AMC  
● CON  
● DOX

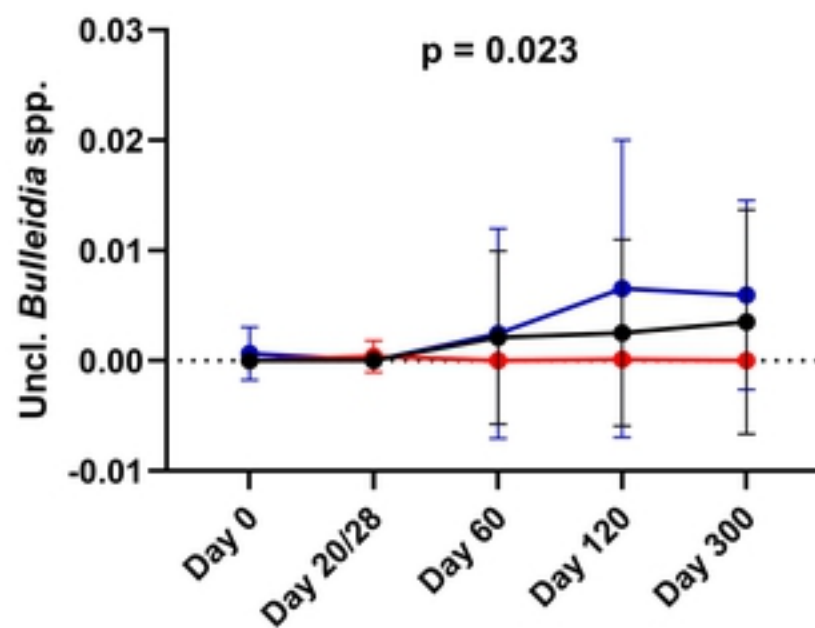

● AMC  
● CON  
● DOX

Fig6



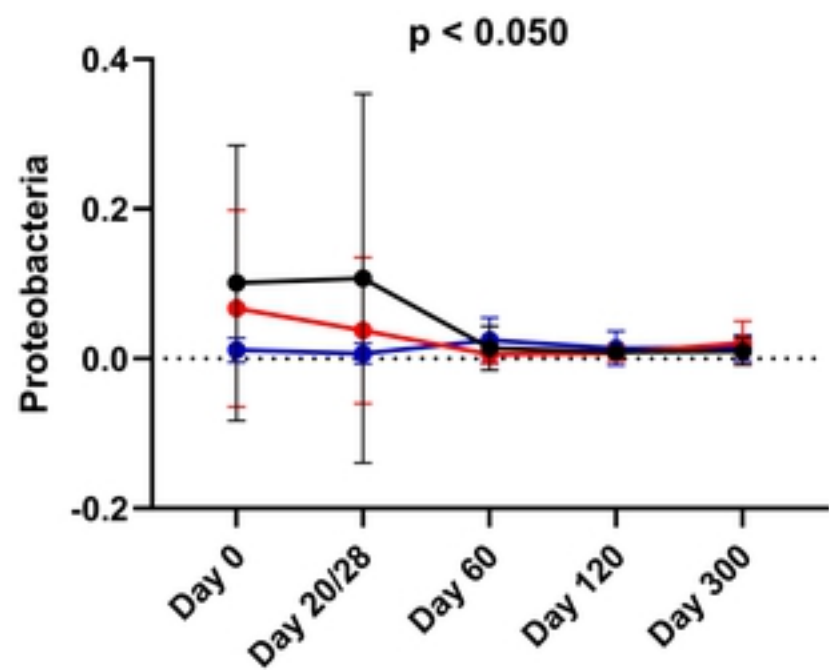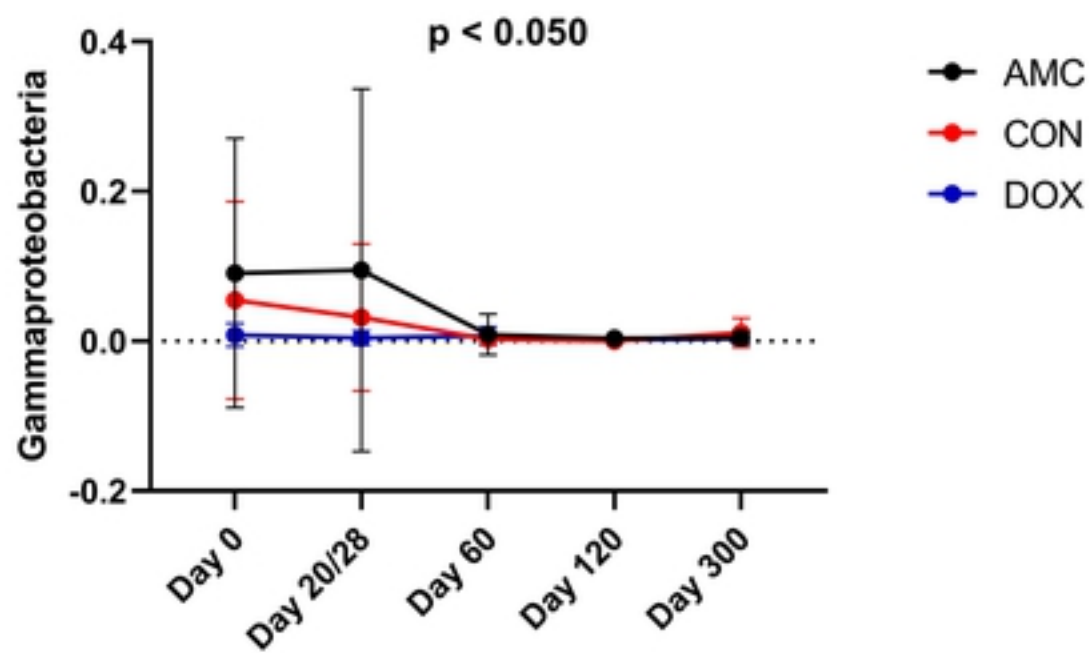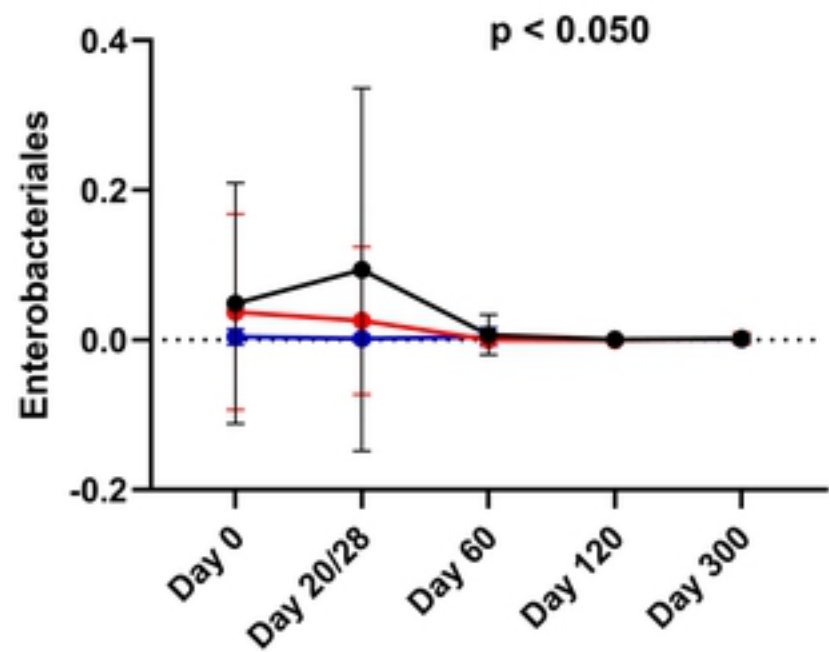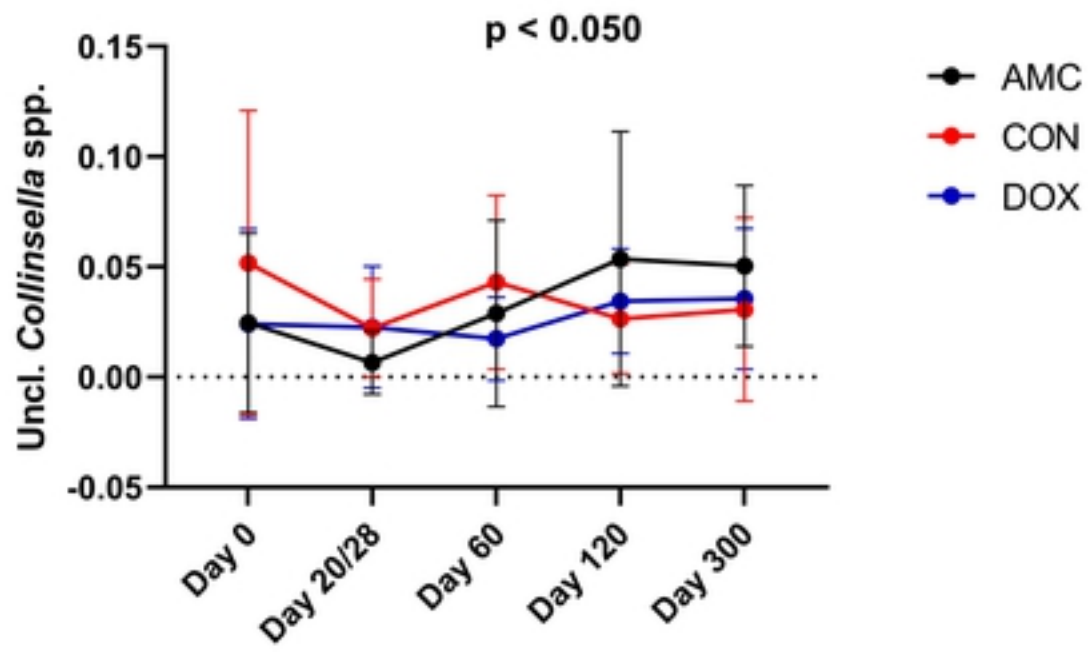

Fig 7

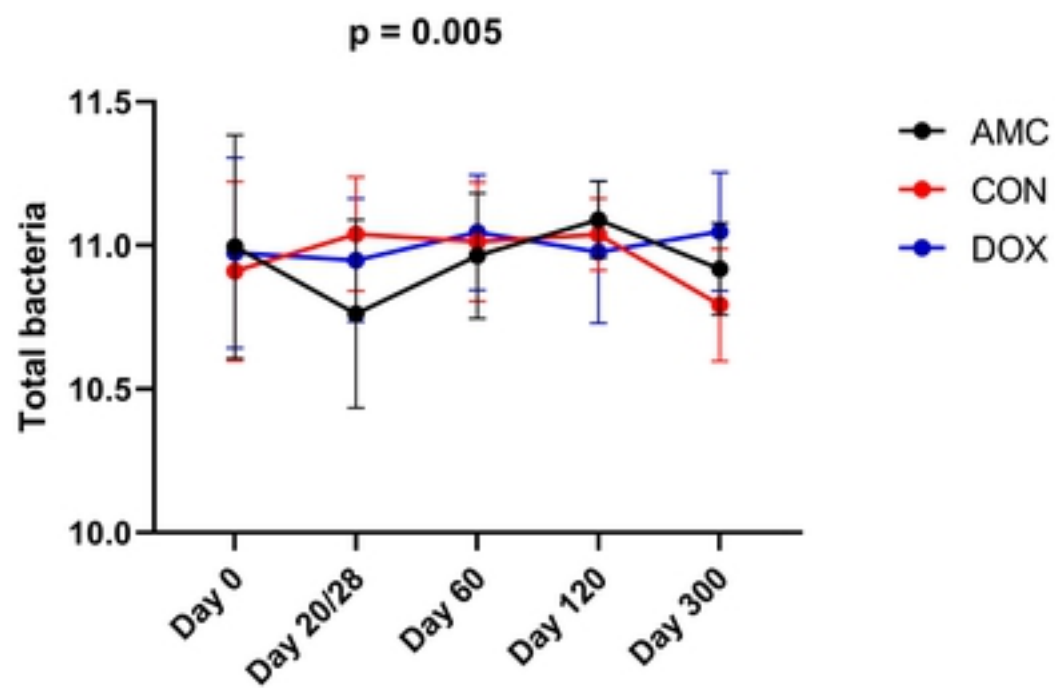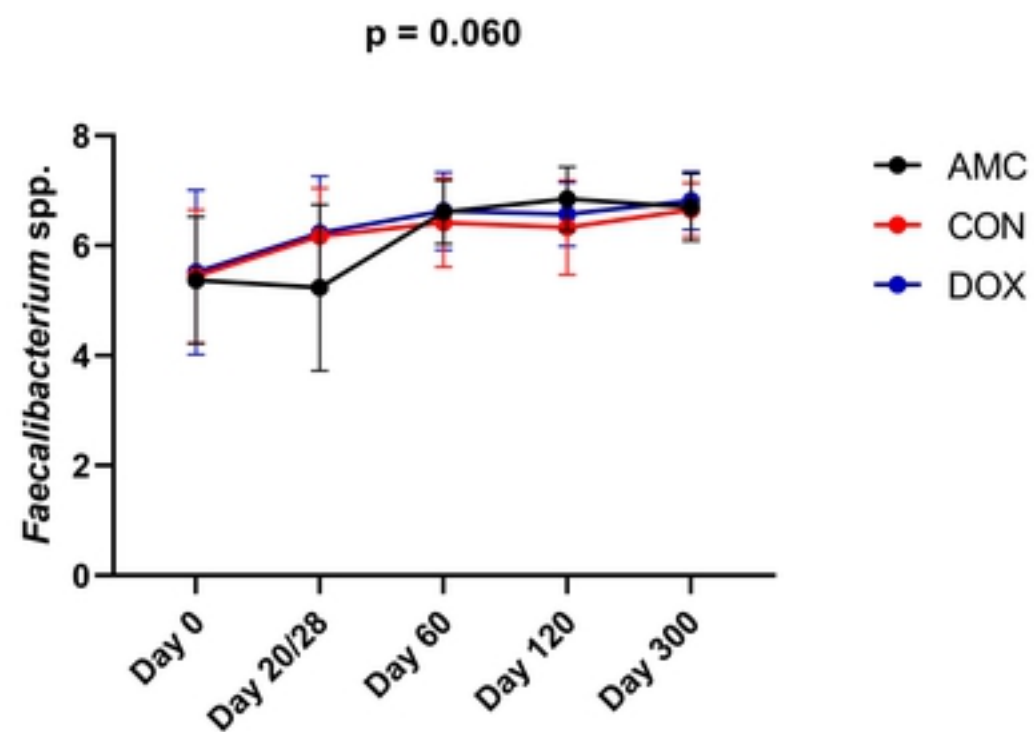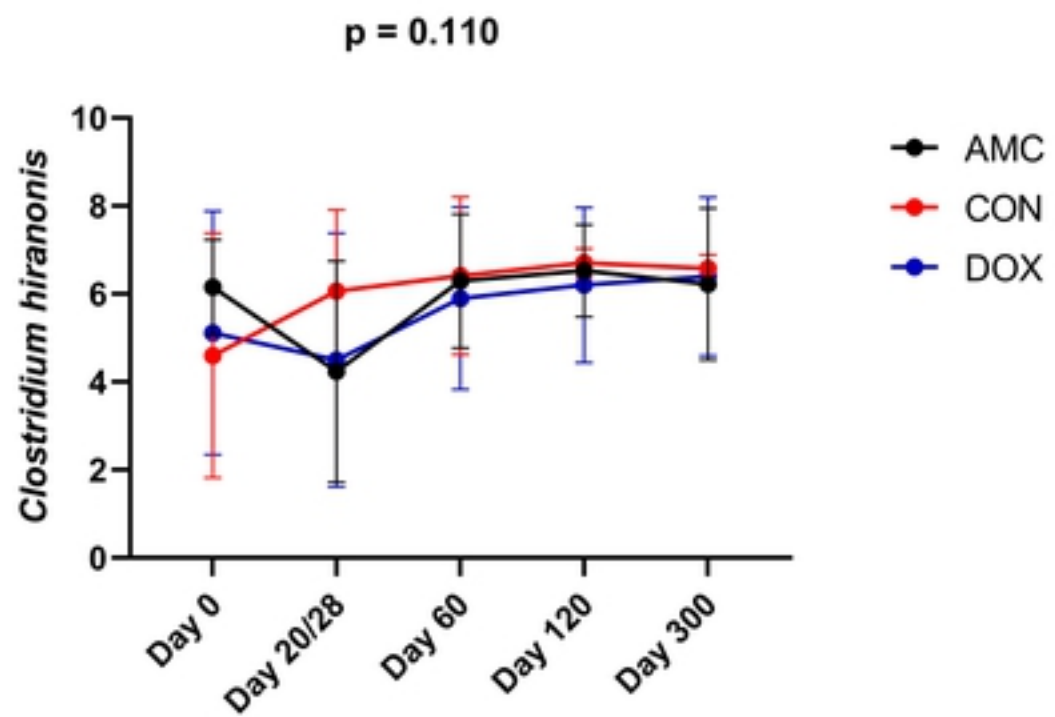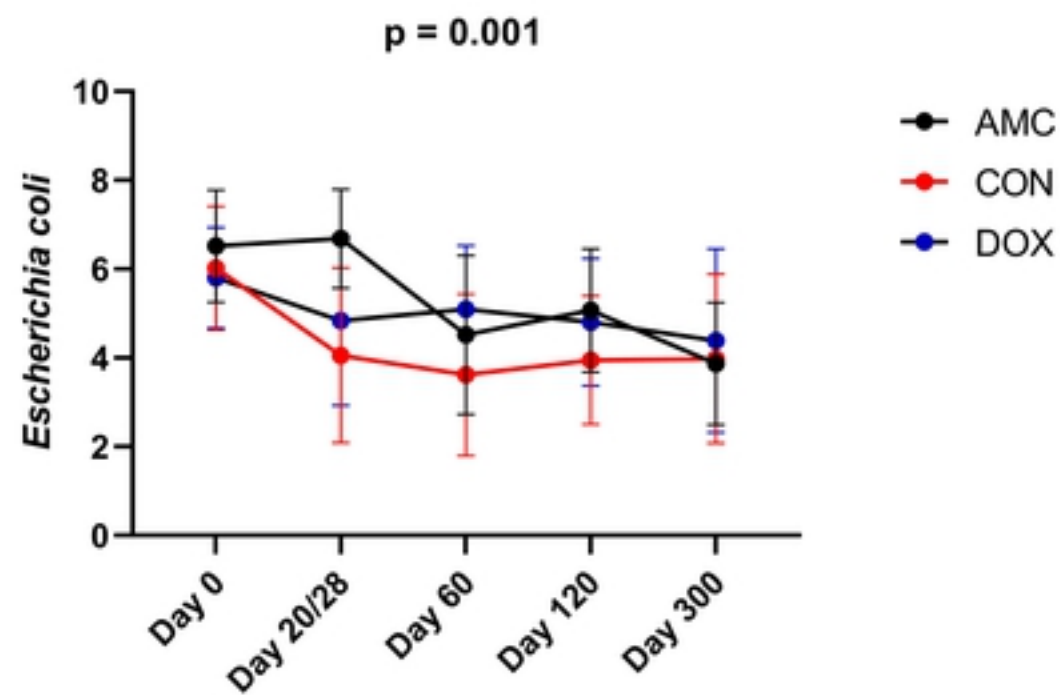

Fig8

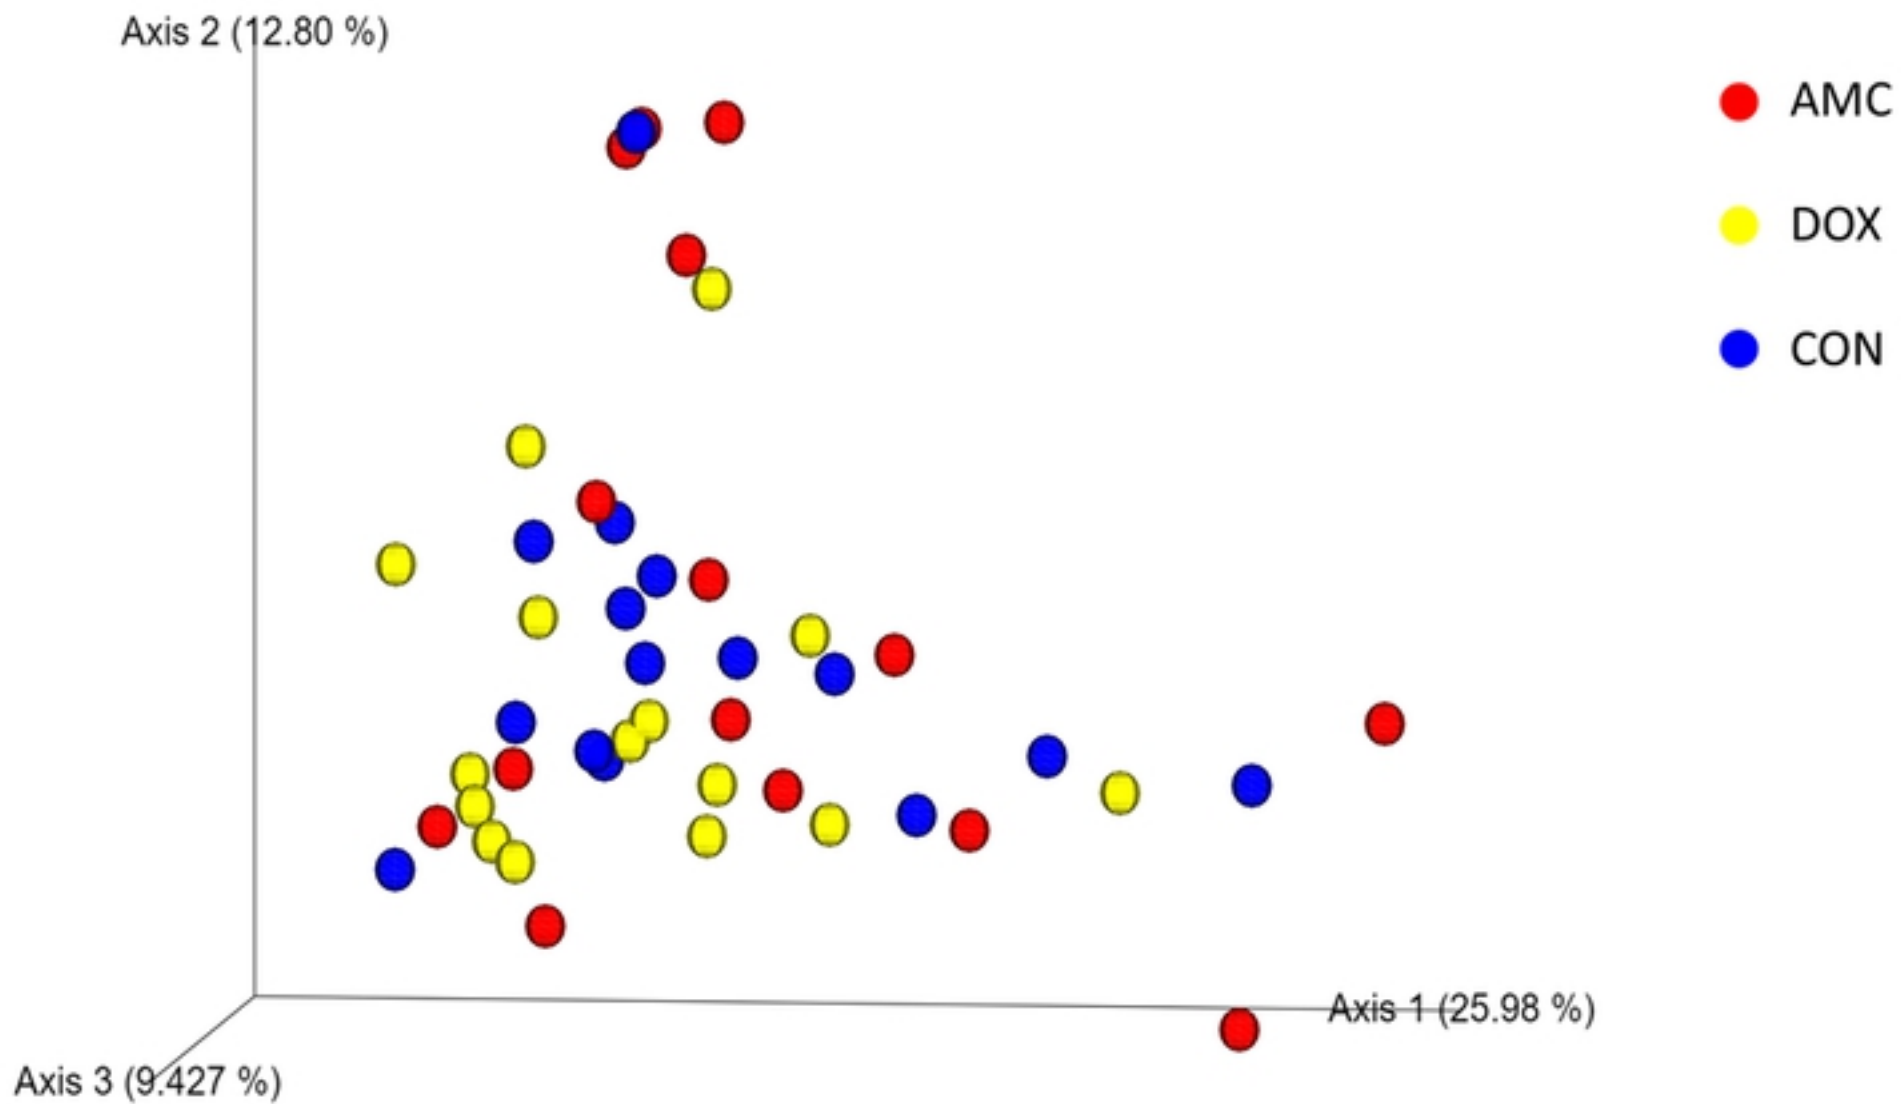

Fig9

AMC group

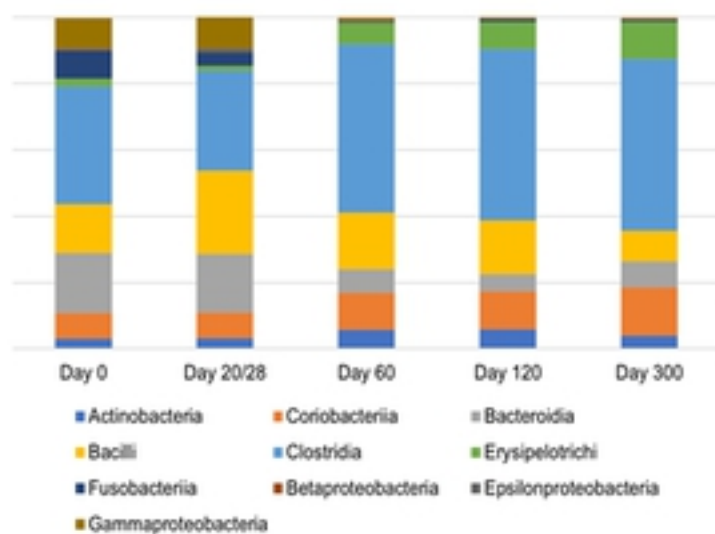

CON group

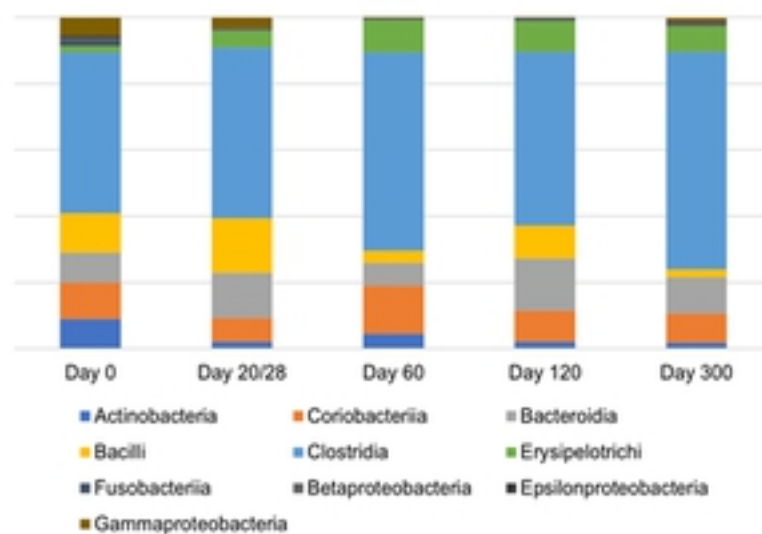

DOX group

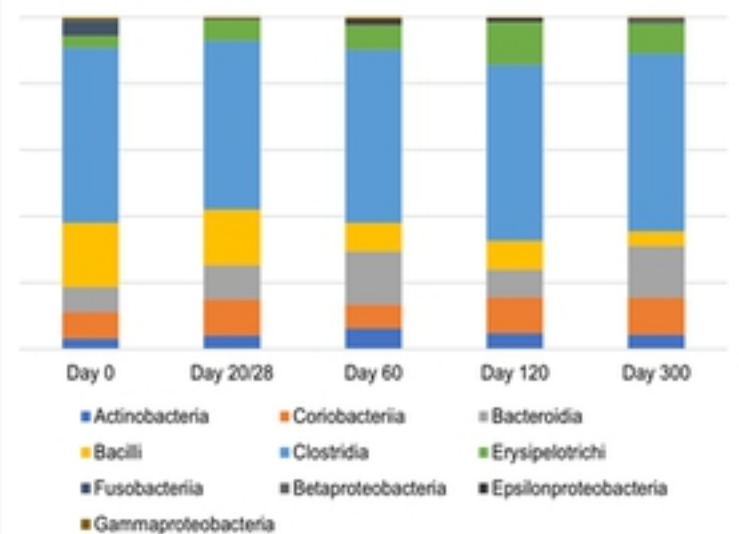

Fig10
